# Supplementary material for: Pan-Cancer DNA Methylation Analysis and Tumor Origin Identification of Carcinoma of Unknown Primary Site Based on Multi-Omics
Source: Front Genet. 2022 Jan 6;12:798748. doi: 10.3389/fgene.2021.798748 (PMC8770539; doi:10.3389/fgene.2021.798748)
Supplement: Supplementary file 4 [file Table9.XLSX]

## Sheet: Description
	Supplementary Table 6 Gene Ontology based on the epi-driver genes.

## Sheet: Supplementary Table 6
ID	Description	GeneRatio	BgRatio	pvalue	p.adjust	qvalue	geneID	Count
GO:0030198	extracellular matrix organization	71/647	395/18866	3.11198e-31	9.3432e-28	6.15168e-28	COL7A1/SPP1/A2M/ITGA8/FBLN2/LAMC2/CTSK/MMP10/DDR2/COL6A3/COL1A1/PDGFRA/SFRP2/ADAMTS1/ITGB2/LAMB3/FGG/WT1/LCP1/ELF3/FBLN1/CYP1B1/JAM3/ITGA5/COL4A1/TIMP2/COL14A1/FN1/EMILIN1/TNXB/LAMA3/COMP/FGF2/CSGALNACT1/FBN2/COL9A2/COL17A1/CAV1/RAMP2/ITGAX/VCAM1/COL4A2/AGT/SPARC/FBLN5/LAMA4/TGFBI/FERMT1/COL23A1/ITGB6/MMP12/ITGA7/COL8A1/SPOCK2/JAM2/NTN4/DPT/KDR/SPINT1/DPP4/CAV2/COL5A1/COL1A2/ABI3BP/FSCN1/SPINT2/M…	71
GO:0043062	extracellular structure organization	71/647	396/18866	3.67553e-31	9.3432e-28	6.15168e-28	COL7A1/SPP1/A2M/ITGA8/FBLN2/LAMC2/CTSK/MMP10/DDR2/COL6A3/COL1A1/PDGFRA/SFRP2/ADAMTS1/ITGB2/LAMB3/FGG/WT1/LCP1/ELF3/FBLN1/CYP1B1/JAM3/ITGA5/COL4A1/TIMP2/COL14A1/FN1/EMILIN1/TNXB/LAMA3/COMP/FGF2/CSGALNACT1/FBN2/COL9A2/COL17A1/CAV1/RAMP2/ITGAX/VCAM1/COL4A2/AGT/SPARC/FBLN5/LAMA4/TGFBI/FERMT1/COL23A1/ITGB6/MMP12/ITGA7/COL8A1/SPOCK2/JAM2/NTN4/DPT/KDR/SPINT1/DPP4/CAV2/COL5A1/COL1A2/ABI3BP/FSCN1/SPINT2/M…	71
GO:0003012	muscle system process	66/647	467/18866	6.22273e-23	1.05455e-19	6.94326e-20	KCNMA1/MYLK/HSPB6/EDNRA/CRYAB/PDE9A/TPM1/GATM/LEP/CNN1/KCNQ1/MYOC/HAND2/SORBS2/SSPN/HAMP/GJA5/VIM/CXCR4/SORBS1/CALD1/CKMT2/TACR2/SYNM/ANKRD2/KLF4/FXYD1/DES/COMP/ACTC1/EDN3/EDNRB/CAV1/MEF2C/RGS2/MYL9/BIN1/MYOZ1/KIT/ACTA2/AGT/CACNA1H/ARG2/EHD3/TNNC1/ATP1A1/KCNIP2/ACTG2/MAP2K6/PPP1R12B/ATP1B1/BDKRB2/TPM2/GSN/GATA6/KCNE4/ANXA6/CHGA/CASQ2/PDLIM5/AIF1/MYOM1/CALCRL/ATP1A2/SGCA/PPARGC1A	66
GO:1901342	regulation of vasculature development	62/647	444/18866	2.58273e-21	3.28265e-18	2.16134e-18	SFRP1/CDH5/HSPB6/VEGFA/AQP1/SFRP2/SERPINF1/MEOX2/LEP/ADAMTS1/HOXA5/ITGB2/F3/TEK/WT1/HRG/CYP1B1/CXCR4/ITGA5/DLL4/KLF4/THBS2/EMILIN1/ECM1/GATA2/FGF2/APOH/KLF2/CX3CL1/CLDN5/RAMP2/GPNMB/ITGAX/COL4A2/PTGIS/HYAL1/KIT/RHOJ/ACVRL1/AGT/NGFR/SPARC/FBLN5/ANXA3/C3AR1/FGF9/XDH/KDR/C3/EGR1/NPR1/GATA6/CXCL10/CEACAM1/FGF1/ALOX5/FGF18/SPRY2/RHOB/BMP7/ANGPT2/APLNR	62
GO:0045765	regulation of angiogenesis	56/647	403/18866	3.07444e-19	3.12609e-16	2.05826e-16	SFRP1/CDH5/HSPB6/VEGFA/AQP1/SFRP2/SERPINF1/MEOX2/LEP/ADAMTS1/HOXA5/ITGB2/F3/TEK/HRG/CYP1B1/CXCR4/ITGA5/DLL4/KLF4/THBS2/EMILIN1/ECM1/GATA2/FGF2/APOH/KLF2/CX3CL1/CLDN5/RAMP2/GPNMB/ITGAX/COL4A2/PTGIS/HYAL1/RHOJ/ACVRL1/AGT/NGFR/SPARC/FBLN5/ANXA3/C3AR1/KDR/C3/NPR1/GATA6/CXCL10/CEACAM1/FGF1/ALOX5/FGF18/SPRY2/RHOB/ANGPT2/APLNR	56
GO:0006936	muscle contraction	51/647	362/18866	7.16799e-18	6.07367e-15	3.99898e-15	KCNMA1/MYLK/HSPB6/EDNRA/CRYAB/TPM1/CNN1/KCNQ1/SSPN/GJA5/VIM/CXCR4/SORBS1/CALD1/CKMT2/TACR2/SYNM/ANKRD2/FXYD1/DES/COMP/ACTC1/EDN3/EDNRB/CAV1/RGS2/MYL9/BIN1/KIT/ACTA2/AGT/CACNA1H/ARG2/EHD3/TNNC1/ATP1A1/KCNIP2/ACTG2/MAP2K6/PPP1R12B/ATP1B1/BDKRB2/TPM2/KCNE4/ANXA6/CHGA/CASQ2/MYOM1/CALCRL/ATP1A2/SGCA	51
GO:0031589	cell-substrate adhesion	49/647	359/18866	1.20957e-16	8.78497e-14	5.78413e-14	SFRP1/LIMS2/ITGA8/FBLN2/SDC4/VEGFA/COL1A1/ITGB2/TEK/MYOC/FAM107A/LAMB3/FGG/AGR2/HRG/FBLN1/JAM3/CORO1A/SORBS1/ITGA5/THY1/FERMT2/FN1/EMILIN1/CCL28/COL17A1/CX3CL1/VCAM1/APOD/ACVRL1/FBLN5/FERMT1/ITGB6/MMP12/ITGA7/COL8A1/SPOCK2/NTN4/KDR/CD36/COL26A1/ABI3BP/PTPRO/VWF/RAC2/PLAU/BCAM/ANGPT2/CCL21	49
GO:0034329	cell junction assembly	51/647	434/18866	1.41617e-14	8.99974e-12	5.92554e-12	SFRP1/CDH5/DST/LIMS2/LAMC2/SDC4/GABRB2/KRT5/VEGFA/FLNC/TEK/MYOC/FAM107A/GRHL2/LAMB3/SPTBN2/HRG/GJA5/JAM3/SORBS1/ITGA5/THY1/CLDN4/FERMT2/FN1/THBS2/LAMA3/CLDN8/COL17A1/CLDN5/CAV1/RAMP2/MEF2C/APOD/ACVRL1/KRT14/AGT/SPOCK2/KDR/CDH6/UGT8/NFASC/FSCN1/PTPRO/MAP1B/PDLIM5/TNS1/CLDN3/CRB3/CLDN1/CLDN16	51
GO:0060537	muscle tissue development	49/647	409/18866	2.25003e-14	1.27102e-11	8.36854e-12	S100B/SVIL/ITGA8/MYLK/TPM1/VEGFA/TGFBR3/PDGFRA/MEOX2/ALDH1A2/HLF/WT1/HOXD10/SORBS2/ASB2/FHL2/MYH10/HAMP/GJA5/DLL4/ANKRD2/MSC/ACTC1/FGF2/KLF5/TCF21/CAV1/MEF2C/PROX1/RGS2/NR2F2/MYOZ1/PITX1/AGT/ZFPM2/CFL2/TNNC1/FGF9/S1PR1/CSRP1/JPH2/CAV2/EGR1/GATA6/PDLIM5/MYOM1/BMP7/CDK1/PPARGC1A	49
GO:0003018	vascular process in circulatory system	32/647	190/18866	7.70626e-14	3.61971e-11	2.38326e-11	CDH5/ABCB1/KCNMA1/EDNRA/VEGFA/LEP/APOE/TEK/FGG/GJA5/TACR2/COMP/EDN3/EDNRB/CLDN5/CAV1/RAMP2/AVPR1A/RGS2/ADRB1/ACTA2/AGT/CASR/KNG1/AKAP12/EGFR/BDKRB2/NPR1/CD36/CEACAM1/CHGA/ATP1A2	32
GO:0050673	epithelial cell proliferation	51/647	453/18866	7.83178e-14	3.61971e-11	2.38326e-11	SFRP1/LIMS2/CXCL12/VEGFA/TGFBR3/SFRP2/SERPINF1/LEP/ALDH1A2/HOXA5/APOE/GATA3/F3/TEK/IGF2/DLL4/IGFBP4/CCL5/CDKN1C/SFN/ECM1/GATA2/FGF2/FGF7/APOH/EDNRB/CAV1/FST/MEF2C/PROX1/NR2F2/HYAL1/KIT/ACVRL1/NGFR/SPARC/FERMT1/MMP12/COL8A1/FGF9/XDH/KDR/EGFR/CAV2/NFIB/CEACAM1/FGF1/ALOX5/IGFBP3/CLDN1/APLNR	51
GO:0010810	regulation of cell-substrate adhesion	34/647	217/18866	1.1286e-13	4.7815e-11	3.1482e-11	SFRP1/LIMS2/FBLN2/SDC4/VEGFA/COL1A1/TEK/MYOC/FAM107A/FGG/AGR2/HRG/FBLN1/ITGA5/THY1/FN1/EMILIN1/CCL28/CX3CL1/APOD/ACVRL1/FERMT1/MMP12/COL8A1/SPOCK2/KDR/CD36/COL26A1/ABI3BP/PTPRO/RAC2/PLAU/ANGPT2/CCL21	34
GO:1904018	positive regulation of vasculature development	35/647	235/18866	2.29099e-13	8.36104e-11	5.50501e-11	CDH5/HSPB6/VEGFA/AQP1/SFRP2/ITGB2/F3/TEK/CYP1B1/CXCR4/ITGA5/KLF4/ECM1/GATA2/FGF2/CX3CL1/RAMP2/ITGAX/PTGIS/HYAL1/KIT/RHOJ/ACVRL1/ANXA3/C3AR1/KDR/C3/EGR1/GATA6/CEACAM1/FGF1/FGF18/RHOB/ANGPT2/APLNR	35
GO:0007044	cell-substrate junction assembly	23/647	99/18866	2.30241e-13	8.36104e-11	5.50501e-11	SFRP1/DST/LAMC2/SDC4/KRT5/VEGFA/TEK/MYOC/FAM107A/LAMB3/HRG/SORBS1/ITGA5/THY1/FERMT2/FN1/LAMA3/COL17A1/APOD/ACVRL1/KRT14/KDR/TNS1	23
GO:0150115	cell-substrate junction organization	23/647	102/18866	4.53852e-13	1.53826e-10	1.01281e-10	SFRP1/DST/LAMC2/SDC4/KRT5/VEGFA/TEK/MYOC/FAM107A/LAMB3/HRG/SORBS1/ITGA5/THY1/FERMT2/FN1/LAMA3/COL17A1/APOD/ACVRL1/KRT14/KDR/TNS1	23
GO:0045785	positive regulation of cell adhesion	48/647	428/18866	5.03554e-13	1.60004e-10	1.05349e-10	SFRP1/LIMS2/FBLN2/SDC4/CXCL12/HLA-DPA1/TPM1/VEGFA/SFRP2/HLA-DPB1/LEP/GATA3/ITGB2/TEK/MYOC/VAV3/FGG/IGF2/AGR2/HRG/CORO1A/ITGA5/THY1/TNFRSF18/CCL5/FN1/EMILIN1/CCL28/CX3CL1/CAV1/VTCN1/VCAM1/HYAL1/CD4/FERMT1/SELP/COL8A1/SPOCK2/KDR/DPP4/CD36/COL26A1/ABI3BP/ALOX5/AIF1/BMP7/AGER/CCL21	48
GO:0003014	renal system process	25/647	125/18866	7.88593e-13	2.29206e-10	1.50912e-10	NPR3/KCNMA1/AQP1/AQP4/KCNQ1/HSD11B2/SLC15A2/GJA5/AQP3/WNK4/CLDN4/EDNRB/AVPR1A/ATP6V1B1/AGT/SGK1/CYP4A11/CYP4F2/NPR1/GSN/PTPRO/TFAP2B/ADCY5/PRKAR2B/REN	25
GO:0001667	ameboidal-type cell migration	51/647	481/18866	8.1151e-13	2.29206e-10	1.50912e-10	CDH5/SDC4/DDR2/VEGFA/SERPINF1/MEOX2/APOE/GATA3/ITGB2/TEK/HAND2/HRG/CYP1B1/DLL4/KLF4/FN1/FOLR1/GATA2/FGF2/FGF7/APOH/EDN3/EDNRB/MEF2C/PROX1/NR2F2/HYAL1/KIT/RHOJ/ACVRL1/S100P/TDGF1/AGT/SPARC/FERMT1/ANXA3/RAB25/AKAP12/KDR/DPP4/SEMA3B/ANXA6/CEACAM1/FGF1/FGF18/RHOB/S100A2/BMP7/TNS1/ANGPT2/MET	51
GO:0014706	striated muscle tissue development	45/647	389/18866	9.3346e-13	2.47381e-10	1.62879e-10	S100B/SVIL/TPM1/VEGFA/TGFBR3/PDGFRA/MEOX2/ALDH1A2/HLF/WT1/HOXD10/SORBS2/ASB2/FHL2/MYH10/HAMP/GJA5/DLL4/ANKRD2/MSC/ACTC1/FGF2/KLF5/TCF21/CAV1/MEF2C/PROX1/RGS2/NR2F2/MYOZ1/PITX1/AGT/ZFPM2/CFL2/TNNC1/FGF9/S1PR1/JPH2/CAV2/EGR1/GATA6/PDLIM5/MYOM1/BMP7/CDK1	45
GO:0045766	positive regulation of angiogenesis	32/647	208/18866	1.00567e-12	2.47381e-10	1.62879e-10	CDH5/HSPB6/VEGFA/AQP1/SFRP2/ITGB2/F3/TEK/CYP1B1/CXCR4/ITGA5/KLF4/ECM1/GATA2/FGF2/CX3CL1/RAMP2/ITGAX/PTGIS/HYAL1/RHOJ/ACVRL1/ANXA3/C3AR1/KDR/C3/GATA6/FGF1/FGF18/RHOB/ANGPT2/APLNR	32
GO:0042692	muscle cell differentiation	45/647	390/18866	1.02183e-12	2.47381e-10	1.62879e-10	ITGA8/TPM1/VEGFA/BOC/PDGFRA/FLNC/IGF2/WT1/KRT8/SORBS2/SCGB3A1/FHL2/MYH10/HAMP/KRT19/ANKRD2/MSX1/COMP/ACTC1/UCHL1/KLF5/EDNRB/RAMP2/MEF2C/AVPR1A/PROX1/RGS2/BIN1/MYOZ1/KIT/BARX2/AGT/CACNA1H/CFL2/EHD2/JAM2/FGF9/CSRP1/CAV2/GATA6/CXCL10/CEACAM5/CASQ2/PDLIM5/CDK1	45
GO:0050678	regulation of epithelial cell proliferation	45/647	395/18866	1.59823e-12	3.69336e-10	2.43176e-10	SFRP1/LIMS2/CXCL12/VEGFA/TGFBR3/SFRP2/SERPINF1/LEP/ALDH1A2/HOXA5/APOE/GATA3/F3/TEK/IGF2/DLL4/CCL5/CDKN1C/SFN/ECM1/GATA2/FGF2/FGF7/APOH/EDNRB/CAV1/MEF2C/PROX1/NR2F2/HYAL1/ACVRL1/NGFR/SPARC/MMP12/FGF9/XDH/KDR/EGFR/CAV2/NFIB/CEACAM1/FGF1/ALOX5/CLDN1/APLNR	45
GO:0051146	striated muscle cell differentiation	38/647	295/18866	2.18589e-12	4.83176e-10	3.18129e-10	TPM1/VEGFA/PDGFRA/FLNC/IGF2/WT1/KRT8/SORBS2/SCGB3A1/FHL2/MYH10/HAMP/KRT19/ANKRD2/MSX1/COMP/ACTC1/UCHL1/KLF5/MEF2C/AVPR1A/PROX1/RGS2/MYOZ1/BARX2/AGT/CACNA1H/CFL2/EHD2/JAM2/CSRP1/CAV2/GATA6/CXCL10/CEACAM5/CASQ2/PDLIM5/CDK1	38
GO:0052547	regulation of peptidase activity	49/647	466/18866	3.15983e-12	6.62816e-10	4.36407e-10	COL7A1/A2M/CRYAB/PSMB9/VEGFA/COL6A3/AQP1/SFRP2/SERPINF1/SERPINA1/SERPINA5/CYFIP2/F3/EGLN3/HRG/FBLN1/SERPING1/TIMP2/CLDN4/KLF4/NOL3/FN1/SFN/ECM1/CAV1/BIN1/GAPDH/TIMP4/AGT/NGFR/SOX7/SLPI/PZP/KNG1/TFPI2/SPOCK2/XDH/SPINT1/CST7/C3/GSN/CPAMD8/TFAP2B/SPINT2/PTTG1/DHCR24/AGER/CLDN3/LTF	49
GO:0010811	positive regulation of cell-substrate adhesion	24/647	122/18866	3.30532e-12	6.62816e-10	4.36407e-10	SFRP1/LIMS2/FBLN2/SDC4/VEGFA/TEK/MYOC/FGG/AGR2/HRG/ITGA5/THY1/FN1/EMILIN1/CCL28/CX3CL1/FERMT1/COL8A1/SPOCK2/KDR/CD36/COL26A1/ABI3BP/CCL21	24
GO:0010951	negative regulation of endopeptidase activity	35/647	258/18866	3.67697e-12	6.62816e-10	4.36407e-10	COL7A1/A2M/CRYAB/VEGFA/COL6A3/AQP1/SFRP2/SERPINF1/SERPINA1/SERPINA5/HRG/SERPING1/TIMP2/KLF4/NOL3/SFN/BIN1/GAPDH/TIMP4/AGT/NGFR/SLPI/PZP/KNG1/TFPI2/SPOCK2/SPINT1/CST7/C3/CPAMD8/TFAP2B/SPINT2/PTTG1/DHCR24/LTF	35
GO:0090130	tissue migration	43/647	374/18866	3.73682e-12	6.62816e-10	4.36407e-10	CDH5/VEGFA/SERPINF1/MEOX2/APOE/GATA3/ITGB2/TEK/GRHL2/HRG/CYP1B1/DLL4/KLF4/GATA2/ACTC1/FGF2/FGF7/APOH/MEF2C/PROX1/NR2F2/HYAL1/KIT/RHOJ/ACVRL1/S100P/ACTA2/TDGF1/AGT/SPARC/FERMT1/ANXA3/RAB25/KDR/DPP4/ACTG2/CEACAM1/FGF1/FGF18/RHOB/S100A2/ANGPT2/MET	43
GO:0010466	negative regulation of peptidase activity	36/647	272/18866	3.76239e-12	6.62816e-10	4.36407e-10	COL7A1/A2M/CRYAB/VEGFA/COL6A3/AQP1/SFRP2/SERPINF1/SERPINA1/SERPINA5/HRG/SERPING1/TIMP2/KLF4/NOL3/SFN/ECM1/BIN1/GAPDH/TIMP4/AGT/NGFR/SLPI/PZP/KNG1/TFPI2/SPOCK2/SPINT1/CST7/C3/CPAMD8/TFAP2B/SPINT2/PTTG1/DHCR24/LTF	36
GO:0001666	response to hypoxia	42/647	359/18866	3.78082e-12	6.62816e-10	4.36407e-10	SFRP1/S100B/KCNMA1/NR4A2/CXCL12/EDNRA/PLAT/CRYAB/PSMB9/VEGFA/TGFBR3/AQP1/LEP/STC2/TEK/HSD11B2/EGLN3/PKLR/CXCR4/AQP3/NOL3/SOD3/CAV1/RAMP2/PTGIS/ACVRL1/CASR/ASCL2/DPP4/EGR1/ATP1B1/GATA6/SLC2A1/KCNK3/CA9/BMP7/AGER/PLAU/AK4/CLDN3/ANGPT2/PPARGC1A	42
GO:0007517	muscle organ development	45/647	407/18866	4.52501e-12	7.66839e-10	5.04896e-10	S100B/SVIL/MYLK/CRYAB/TPM1/TGFBR3/COL6A3/MEOX2/HLF/WT1/HOXD10/ASB2/HAMP/DLL4/ANKRD2/MSX1/MSC/ACTC1/USP2/FGF2/KLF5/TCF21/CAV1/MEF2C/PROX1/RGS2/NR2F2/MYOZ1/PITX1/CACNA1H/ZFPM2/CFL2/TNNC1/ITGA7/FGF9/S1PR1/JPH2/CAV2/EGR1/GATA6/CXCL10/MYOM1/MRAS/CDK1/SGCA	45
GO:0061448	connective tissue development	35/647	262/18866	5.75584e-12	9.43957e-10	6.21513e-10	CTSK/COL1A1/SFRP2/LEP/HOXA5/HAND2/WT1/PTHLH/EFEMP1/MSX1/BMPR1B/COMP/ECM1/FGF2/CSGALNACT1/MEF2C/HYAL1/PITX1/ACVRL1/ACTA2/BARX2/CASR/TGFBI/FGF9/EGR1/CHRDL2/COL5A1/NFIB/ID4/ANXA6/FGF18/SCIN/MMP13/BMP7/PPARGC1A	35
GO:0060326	cell chemotaxis	38/647	311/18866	1.11019e-11	1.71276e-09	1.1277e-09	CXCL12/VEGFA/PDGFRA/CCR5/LGALS3/ITGB2/VAV3/CXCL1/HRG/JAM3/CORO1A/CXCR4/GSTP1/CCL5/FGF2/EDN3/CCL28/EDNRB/CX3CL1/CXCL2/KIT/CCL20/C3AR1/S1PR1/KDR/DPP4/CXCL10/PTPRO/FGF1/CHGA/ALOX5/FGF18/DUSP1/AIF1/RAC2/MET/S100A14/CCL21	38
GO:0036293	response to decreased oxygen levels	42/647	371/18866	1.11175e-11	1.71276e-09	1.1277e-09	SFRP1/S100B/KCNMA1/NR4A2/CXCL12/EDNRA/PLAT/CRYAB/PSMB9/VEGFA/TGFBR3/AQP1/LEP/STC2/TEK/HSD11B2/EGLN3/PKLR/CXCR4/AQP3/NOL3/SOD3/CAV1/RAMP2/PTGIS/ACVRL1/CASR/ASCL2/DPP4/EGR1/ATP1B1/GATA6/SLC2A1/KCNK3/CA9/BMP7/AGER/PLAU/AK4/CLDN3/ANGPT2/PPARGC1A	42
GO:0007596	blood coagulation	40/647	343/18866	1.38085e-11	2.06478e-09	1.35948e-09	F11/A2M/PLAT/COL1A1/PDGFRA/SERPINA1/SERPINA5/APOE/GATA3/F3/VAV3/FGG/HRG/FBLN1/SERPING1/F10/FN1/COMP/GATA2/APOH/CAV1/MYL9/ZFPM2/EHD3/SELP/EHD2/KNG1/TFPI2/PLEK/CSRP1/CD177/ENTPD1/CYP4F2/COL1A2/GATA6/CD36/CEACAM1/PRKAR2B/VWF/PLAU	40
GO:0007160	cell-matrix adhesion	32/647	230/18866	1.58919e-11	2.30841e-09	1.51989e-09	SFRP1/ITGA8/SDC4/VEGFA/ITGB2/TEK/MYOC/FAM107A/FGG/HRG/JAM3/SORBS1/THY1/FERMT2/FN1/EMILIN1/CCL28/COL17A1/CX3CL1/VCAM1/APOD/ACVRL1/FBLN5/FERMT1/ITGB6/MMP12/ITGA7/KDR/CD36/PLAU/BCAM/CCL21	32
GO:0007599	hemostasis	40/647	348/18866	2.17246e-11	3.06799e-09	2.02e-09	F11/A2M/PLAT/COL1A1/PDGFRA/SERPINA1/SERPINA5/APOE/GATA3/F3/VAV3/FGG/HRG/FBLN1/SERPING1/F10/FN1/COMP/GATA2/APOH/CAV1/MYL9/ZFPM2/EHD3/SELP/EHD2/KNG1/TFPI2/PLEK/CSRP1/CD177/ENTPD1/CYP4F2/COL1A2/GATA6/CD36/CEACAM1/PRKAR2B/VWF/PLAU	40
GO:0050817	coagulation	40/647	349/18866	2.37587e-11	3.26457e-09	2.14943e-09	F11/A2M/PLAT/COL1A1/PDGFRA/SERPINA1/SERPINA5/APOE/GATA3/F3/VAV3/FGG/HRG/FBLN1/SERPING1/F10/FN1/COMP/GATA2/APOH/CAV1/MYL9/ZFPM2/EHD3/SELP/EHD2/KNG1/TFPI2/PLEK/CSRP1/CD177/ENTPD1/CYP4F2/COL1A2/GATA6/CD36/CEACAM1/PRKAR2B/VWF/PLAU	40
GO:0070482	response to oxygen levels	43/647	396/18866	2.48476e-11	3.30033e-09	2.17298e-09	SFRP1/S100B/KCNMA1/NR4A2/CXCL12/EDNRA/PLAT/CRYAB/PSMB9/VEGFA/TGFBR3/AQP1/COL1A1/LEP/STC2/TEK/HSD11B2/EGLN3/PKLR/CXCR4/AQP3/NOL3/SOD3/CAV1/RAMP2/PTGIS/ACVRL1/CASR/ASCL2/DPP4/EGR1/ATP1B1/GATA6/SLC2A1/KCNK3/CA9/BMP7/AGER/PLAU/AK4/CLDN3/ANGPT2/PPARGC1A	43
GO:0033273	response to vitamin	20/647	91/18866	2.53172e-11	3.30033e-09	2.17298e-09	SFRP1/SPP1/COL1A1/LEP/ALDH1A2/STC2/HAMP/GSTP1/AQP3/FOLR1/SLC34A1/CD4/ALPL/SPARC/CASR/EGFR/GSN/CXCL10/MAP1B/BMP7	20
GO:0042493	response to drug	43/647	397/18866	2.69829e-11	3.42953e-09	2.25804e-09	SFRP1/ABCB1/AQP1/COL1A1/DDC/SFRP2/GATA3/KCNQ1/FBP1/INHBA/VAV3/HSD11B2/CXCR4/TIMP2/PPP1R14A/ACTC1/UCHL1/MEF2C/APOD/SLC34A1/LPL/TIMP4/CYP2B6/ATP1A1/MGST1/CYP2J2/EGFR/MAP2K6/NNMT/GATA6/AOC1/TFAP2B/MAP1B/MT2A/CYP2E1/NAT8/KCNK3/CA9/PRKAR2B/REN/CDK1/AK4/PPARGC1A	43
GO:0008217	regulation of blood pressure	28/647	187/18866	5.16508e-11	6.2522e-09	4.11653e-09	NPR3/EDNRA/TPM1/LEP/MME/HSD11B2/KLK1/GJA5/EDN3/EDNRB/RAMP2/AVPR1A/ADRB1/NR2F2/ACVRL1/ACTA2/AGT/ENPEP/SGK1/ATP1A1/CYP4A11/CYP4F2/NPR1/COL1A2/PTPRO/CHGA/REN/ATP1A2	28
GO:0061138	morphogenesis of a branching epithelium	28/647	187/18866	5.16508e-11	6.2522e-09	4.11653e-09	SFRP1/EDNRA/VEGFA/SFRP2/HOXA5/GRHL2/WT1/HHIP/COL4A1/DLL4/ST14/FGF2/FGF7/PAX8/TCF21/PROX1/AGT/CASR/NTN4/RASIP1/KDR/SPINT1/EGF/FGF1/SPRY2/SPINT2/BMP7/MET	28
GO:0001763	morphogenesis of a branching structure	29/647	201/18866	5.87548e-11	6.94673e-09	4.57381e-09	SFRP1/EDNRA/VEGFA/SFRP2/HOXA5/GRHL2/WT1/HHIP/COL4A1/DLL4/ST14/FGF2/FGF7/PAX8/TCF21/PROX1/TDGF1/AGT/CASR/NTN4/RASIP1/KDR/SPINT1/EGF/FGF1/SPRY2/SPINT2/BMP7/MET	29
GO:0061041	regulation of wound healing	25/647	151/18866	6.14851e-11	7.10433e-09	4.67758e-09	F11/MYLK/PLAT/PDGFRA/APOE/F3/FGG/HRG/CXCR4/SERPING1/CLDN4/FGF2/APOH/CAV1/DUOX1/SELP/KNG1/PLEK/CD36/CEACAM1/ALOX5/AGER/PLAU/CLDN3/CLDN1	25
GO:0001655	urogenital system development	38/647	330/18866	6.59683e-11	7.45295e-09	4.90712e-09	SFRP1/ITGA8/SDC4/VEGFA/PDGFRA/SERPINF1/ALDH1A2/ADAMTS1/MME/GATA3/TEK/WT1/COL4A1/WNK4/EPCAM/GATA2/FGF2/PAX8/TCF21/MEF2C/PROX1/SLC34A1/ACTA2/AGT/ENPEP/ARG2/TFAP2A/CYP4A11/EGR1/ID4/PTPRO/FGF1/TFAP2B/ALOX15B/CALB1/BMP7/REN/ANGPT2	38
GO:0050918	positive chemotaxis	17/647	67/18866	6.95251e-11	7.68404e-09	5.05926e-09	CXCL12/VEGFA/LGALS3/F3/CORO1A/CCL5/FGF2/FGF7/CX3CL1/GPNMB/CASR/S1PR1/KDR/CXCL10/AGER/ANGPT2/MET	17
GO:0060562	epithelial tube morphogenesis	38/647	331/18866	7.2159e-11	7.80546e-09	5.13921e-09	SFRP1/SDC4/EDNRA/VEGFA/SFRP2/HOXA5/GATA3/GRHL2/HAND2/WT1/CXCR4/HHIP/COL4A1/DLL4/WNK4/ST14/FOLR1/FGF2/PAX8/TCF21/MEF2C/ITGAX/PROX1/SOSTDC1/ACVRL1/AGT/CASR/RASIP1/KDR/SPINT1/EGF/CXCL10/FGF1/SPRY2/RHOB/SPINT2/BMP7/MET	38
GO:0090132	epithelium migration	40/647	368/18866	1.21586e-10	1.27654e-08	8.40489e-09	CDH5/VEGFA/SERPINF1/MEOX2/APOE/GATA3/ITGB2/TEK/GRHL2/HRG/CYP1B1/DLL4/KLF4/GATA2/FGF2/FGF7/APOH/MEF2C/PROX1/NR2F2/HYAL1/KIT/RHOJ/ACVRL1/S100P/TDGF1/AGT/SPARC/FERMT1/ANXA3/RAB25/KDR/DPP4/CEACAM1/FGF1/FGF18/RHOB/S100A2/ANGPT2/MET	40
GO:0072001	renal system development	35/647	292/18866	1.25397e-10	1.27654e-08	8.40489e-09	SFRP1/ITGA8/SDC4/VEGFA/PDGFRA/SERPINF1/ALDH1A2/ADAMTS1/MME/GATA3/TEK/WT1/COL4A1/WNK4/EPCAM/FGF2/PAX8/TCF21/MEF2C/PROX1/SLC34A1/ACTA2/AGT/ENPEP/ARG2/TFAP2A/CYP4A11/EGR1/PTPRO/FGF1/TFAP2B/CALB1/BMP7/REN/ANGPT2	35
GO:0055078	sodium ion homeostasis	15/647	52/18866	1.25545e-10	1.27654e-08	8.40489e-09	SCNN1A/SCNN1B/EDNRB/AVPR1A/ATP6V1B1/AGT/C7/ATP1A1/CYP4A11/ATP1B1/CYP4F2/NPR1/SLC12A1/TFAP2B/ATP1A2	15
GO:1903034	regulation of response to wounding	27/647	183/18866	1.61254e-10	1.60748e-08	1.05839e-08	F11/SPP1/MYLK/PLAT/PDGFRA/APOE/F3/FGG/HRG/CXCR4/SERPING1/CLDN4/KLF4/FGF2/APOH/CAV1/DUOX1/SELP/KNG1/PLEK/CD36/CEACAM1/ALOX5/AGER/PLAU/CLDN3/CLDN1	27
GO:0051216	cartilage development	28/647	197/18866	1.80217e-10	1.76197e-08	1.1601e-08	CTSK/COL1A1/SFRP2/LEP/HOXA5/HAND2/PTHLH/EFEMP1/MSX1/BMPR1B/COMP/ECM1/FGF2/CSGALNACT1/MEF2C/HYAL1/PITX1/ACVRL1/BARX2/TGFBI/FGF9/CHRDL2/NFIB/ANXA6/FGF18/SCIN/MMP13/BMP7	28
GO:0001822	kidney development	34/647	283/18866	2.17446e-10	2.08584e-08	1.37334e-08	SFRP1/ITGA8/SDC4/VEGFA/PDGFRA/SERPINF1/ALDH1A2/ADAMTS1/MME/GATA3/TEK/WT1/WNK4/EPCAM/FGF2/PAX8/TCF21/MEF2C/PROX1/SLC34A1/ACTA2/AGT/ENPEP/ARG2/TFAP2A/CYP4A11/EGR1/PTPRO/FGF1/TFAP2B/CALB1/BMP7/REN/ANGPT2	34
GO:0043542	endothelial cell migration	34/647	286/18866	2.88948e-10	2.68006e-08	1.76459e-08	CDH5/VEGFA/SERPINF1/MEOX2/APOE/GATA3/ITGB2/TEK/HRG/CYP1B1/DLL4/KLF4/GATA2/FGF2/APOH/MEF2C/PROX1/NR2F2/RHOJ/ACVRL1/S100P/TDGF1/AGT/SPARC/ANXA3/KDR/DPP4/CEACAM1/FGF1/FGF18/RHOB/S100A2/ANGPT2/MET	34
GO:0007162	negative regulation of cell adhesion	35/647	301/18866	2.89936e-10	2.68006e-08	1.76459e-08	SDC4/CXCL12/VEGFA/COL1A1/DTX1/LGALS3/MYOC/FAM107A/FGG/HRG/FBLN1/CYP1B1/JAM3/MUC1/IL1RN/KLF4/EPCAM/CCL28/CX3CL1/GPNMB/VTCN1/APOD/ACVRL1/TGFBI/ARG2/IDO1/MMP12/KNG1/JAM2/CEACAM1/PTPRO/SPINT2/DUSP1/ANGPT2/CCL21	35
GO:0001706	endoderm formation	15/647	55/18866	3.03008e-10	2.75088e-08	1.81121e-08	COL7A1/ITGB2/INHBA/LAMB3/ITGA5/FN1/DUSP5/LAMA3/COL4A2/SOX7/ITGA7/COL8A1/COL5A1/GATA6/DUSP1	15
GO:0010631	epithelial cell migration	39/647	365/18866	3.45791e-10	3.08421e-08	2.03068e-08	CDH5/VEGFA/SERPINF1/MEOX2/APOE/GATA3/ITGB2/TEK/HRG/CYP1B1/DLL4/KLF4/GATA2/FGF2/FGF7/APOH/MEF2C/PROX1/NR2F2/HYAL1/KIT/RHOJ/ACVRL1/S100P/TDGF1/AGT/SPARC/FERMT1/ANXA3/RAB25/KDR/DPP4/CEACAM1/FGF1/FGF18/RHOB/S100A2/ANGPT2/MET	39
GO:0032102	negative regulation of response to external stimulus	43/647	433/18866	4.33189e-10	3.79713e-08	2.50008e-08	CDH5/F11/SPP1/A2M/PLAT/HLA-F/PDGFRA/SERPINF1/LEP/APOE/GATA3/TNFAIP6/TEK/FGG/HRG/SERPING1/GSTP1/KLF4/ACP5/FGF2/APOH/CX3CL1/LDLR/APOD/PTGIS/ARG2/MMP12/KNG1/DPP4/CST7/SEMA3B/CEACAM1/PTPRO/ALOX5/DUSP1/AIF1/CALCRL/AGER/PLAU/CLDN3/ANGPT2/ENPP3/LTF	43
GO:0052548	regulation of endopeptidase activity	43/647	434/18866	4.65582e-10	4.01189e-08	2.64148e-08	COL7A1/A2M/CRYAB/PSMB9/VEGFA/COL6A3/AQP1/SFRP2/SERPINF1/SERPINA1/SERPINA5/CYFIP2/F3/EGLN3/HRG/SERPING1/TIMP2/KLF4/NOL3/SFN/BIN1/GAPDH/TIMP4/AGT/NGFR/SOX7/SLPI/PZP/KNG1/TFPI2/SPOCK2/XDH/SPINT1/CST7/C3/GSN/CPAMD8/TFAP2B/SPINT2/PTTG1/DHCR24/AGER/LTF	43
GO:0055074	calcium ion homeostasis	45/647	468/18866	4.78808e-10	4.0571e-08	2.67124e-08	CDH5/CXCL12/EDNRA/PDGFRA/CCR5/STC2/APOE/CORO1A/CXCR4/THY1/CCL5/NOL3/GATA2/FGF2/PTGFR/EDN3/CCL28/EDNRB/CX3CL1/CAV1/AVPR1A/CD4/ATP6V1B1/AGT/CASR/SYNPO/C3AR1/KNG1/S1PR1/JPH2/CAV2/ATP1B1/BDKRB2/CD36/CXCL10/ANXA6/TFAP2B/CASQ2/CALB1/ADCY5/KCNK3/ATP1A2/S100A14/APLNR/CCL21	45
GO:0090287	regulation of cellular response to growth factor stimulus	35/647	310/18866	6.47108e-10	5.39328e-08	3.551e-08	SFRP1/CDH5/ITGA8/TGFBR3/SFRP2/RASL11B/CYFIP2/GATA3/HRG/ITGA5/HHIP/TGFB1I1/CDKN1C/MSX1/EMILIN1/FOLR1/FGF2/FBN2/CAV1/FST/CIDEA/SOSTDC1/ACVRL1/AGT/NGFR/FERMT1/FGF9/XDH/LTBP4/CAV2/VEPH1/FGF1/TFAP2B/FGF18/SPRY2	35
GO:0051346	negative regulation of hydrolase activity	45/647	473/18866	6.7341e-10	5.52196e-08	3.63573e-08	COL7A1/A2M/PTPRN2/CRYAB/VEGFA/COL6A3/AQP1/SFRP2/SERPINF1/SERPINA1/SERPINA5/PPP1R1B/LGALS3/HRG/SERPING1/PKMYT1/TIMP2/PPP1R14A/KLF4/NOL3/SFN/ECM1/PPP1R15A/RGS2/BIN1/MYOZ1/GAPDH/TIMP4/AGT/NGFR/SLPI/PZP/KNG1/TFPI2/SPOCK2/SPINT1/CST7/C3/CPAMD8/TFAP2B/SPRY2/SPINT2/PTTG1/DHCR24/LTF	45
GO:0007178	transmembrane receptor protein serine/threonine kinase signaling pathway	38/647	359/18866	7.65277e-10	6.17566e-08	4.06613e-08	SFRP1/CDH5/ITGA8/TGFBR3/SFRP2/RASL11B/INHBA/VIM/FERMT2/TGFB1I1/CDKN1C/MSX1/EMILIN1/BMPR1B/FOLR1/COMP/FBN2/CLDN5/CAV1/FST/CIDEA/SOSTDC1/ACVRL1/TDGF1/FERMT1/TF/FGF9/LTBP4/CAV2/EGR1/VEPH1/COL1A2/TFAP2B/SPRY2/BMP7/INHBB/CGN/TTK	38
GO:0055001	muscle cell development	26/647	183/18866	8.1512e-10	6.47511e-08	4.26329e-08	TPM1/VEGFA/PDGFRA/FLNC/KRT8/SORBS2/FHL2/MYH10/HAMP/KRT19/COMP/ACTC1/UCHL1/RAMP2/MEF2C/PROX1/RGS2/BIN1/MYOZ1/AGT/CFL2/CSRP1/CAV2/CASQ2/PDLIM5/CDK1	26
GO:0072376	protein activation cascade	11/647	28/18866	8.95328e-10	6.89674e-08	4.5409e-08	F11/A2M/F3/FGG/FBLN1/SERPING1/F10/FN1/APOH/KNG1/VWF	11
GO:0072378	blood coagulation, fibrin clot formation	11/647	28/18866	8.95328e-10	6.89674e-08	4.5409e-08	F11/A2M/F3/FGG/FBLN1/SERPING1/F10/FN1/APOH/KNG1/VWF	11
GO:0007584	response to nutrient	25/647	171/18866	9.37267e-10	7.11204e-08	4.68265e-08	SFRP1/SPP1/C2/COL1A1/SFRP2/LEP/ALDH1A2/STC2/HAMP/PKLR/GSTP1/AQP3/FOLR1/CCL28/SLC34A1/CD4/ALPL/LPL/SPARC/CASR/EGFR/GSN/CXCL10/MAP1B/BMP7	25
GO:0001503	ossification	41/647	412/18866	1.04784e-09	7.83418e-08	5.15812e-08	SFRP1/SPP1/CTSK/DDR2/COL1A1/SFRP2/LEP/TEK/MYOC/HAND2/IGF2/FHL2/PTHLH/ATP6V0A4/ACP5/BMPR1B/COMP/ECM1/CSGALNACT1/FBN2/GPNMB/MEF2C/FGR/SLC34A1/ATP6V1B1/ALPL/SPARC/CASR/TFAP2A/FGF9/S1PR1/EGFR/CHRDL2/ID4/COL1A2/ALOX5/FGF18/IGFBP3/MMP13/BMP7/LTF	41
GO:1903522	regulation of blood circulation	34/647	303/18866	1.33942e-09	9.86898e-08	6.49786e-08	ABCC9/HSPB7/TPM1/LEP/KCNQ1/FGG/GJA5/FXYD1/DES/EDN3/CAV1/AVPR1A/RGS2/ADRB1/BIN1/AGT/CACNA1H/CASR/EHD3/ATP1A1/KCNIP2/CYP2J2/EGFR/ATP1B1/BDKRB2/NPR1/KCNE4/CHGA/CASQ2/KCNK3/FXYD6/SLC1A1/AGER/ATP1A2	34
GO:0050920	regulation of chemotaxis	29/647	229/18866	1.37115e-09	9.95846e-08	6.55677e-08	CXCL12/VEGFA/PDGFRA/F3/HRG/JAM3/CXCR4/GSTP1/CCL5/FGF2/EDN3/CASR/C3AR1/S1PR1/KDR/DPP4/SEMA3B/CXCL10/PTPRO/FGF1/FGF18/DUSP1/AIF1/RAC2/AGER/ANGPT2/MET/S100A14/CCL21	29
GO:0051271	negative regulation of cellular component movement	40/647	400/18866	1.46003e-09	1.04546e-07	6.88344e-08	SFRP1/CXCL12/TPM1/TGFBR3/SFRP2/SERPINF1/MEOX2/APOE/GATA3/HRG/FBLN1/CYP1B1/THY1/DLL4/GSTP1/KLF4/EMILIN1/FGF2/APOH/CCL28/CX3CL1/CLDN5/MEF2C/APOD/NR2F2/BIN1/ACVRL1/DPP4/SEMA3B/PTPRO/ALOX15B/RHOB/IGFBP3/SPINT2/DUSP1/AIF1/CLDN3/ANGPT2/CCL21/PPARGC1A	40
GO:0045861	negative regulation of proteolysis	38/647	369/18866	1.66678e-09	1.17693e-07	7.74908e-08	COL7A1/A2M/PLAT/CRYAB/VEGFA/COL6A3/AQP1/SFRP2/SERPINF1/SERPINA1/SERPINA5/HRG/SERPING1/TIMP2/KLF4/NOL3/SFN/ECM1/BIN1/GAPDH/TIMP4/AGT/NGFR/SLPI/PZP/KNG1/TFPI2/SPOCK2/SPINT1/CST7/C3/GAS1/CPAMD8/TFAP2B/SPINT2/PTTG1/DHCR24/LTF	38
GO:0030595	leukocyte chemotaxis	29/647	232/18866	1.86138e-09	1.29634e-07	8.53525e-08	CXCL12/VEGFA/CCR5/LGALS3/ITGB2/VAV3/CXCL1/JAM3/CORO1A/CXCR4/CCL5/EDN3/EDNRB/CX3CL1/CXCL2/KIT/CCL20/C3AR1/S1PR1/DPP4/CXCL10/PTPRO/CHGA/ALOX5/DUSP1/AIF1/RAC2/S100A14/CCL21	29
GO:0150063	visual system development	39/647	388/18866	2.03122e-09	1.3955e-07	9.18816e-08	CRYAB/VEGFA/PDGFRA/SERPINF1/ALDH1A2/GATA3/INHBA/GRHL2/WT1/MYH10/CYP1B1/VIM/THY1/COL4A1/DLL4/TUB/USH1C/KLF4/EFEMP1/BMPR1B/FGF2/FBN2/PROX1/RHOJ/ACVRL1/COL8A1/TFAP2A/FGF9/C1QA/EGFR/C3/ARHGEF15/COL5A1/CPAMD8/TFAP2B/SPRY2/CALB1/MYOM1/BMP7	39
GO:1900046	regulation of hemostasis	17/647	83/18866	2.52005e-09	1.70826e-07	1.12474e-07	F11/PLAT/PDGFRA/APOE/F3/FGG/HRG/SERPING1/COMP/APOH/CAV1/SELP/KNG1/PLEK/CD36/CEACAM1/PLAU	17
GO:1901343	negative regulation of vasculature development	27/647	207/18866	2.64718e-09	1.77082e-07	1.16593e-07	SERPINF1/MEOX2/ADAMTS1/HOXA5/TEK/WT1/HRG/DLL4/KLF4/THBS2/EMILIN1/APOH/KLF2/CLDN5/COL4A2/AGT/NGFR/SPARC/FBLN5/FGF9/XDH/NPR1/CXCL10/ALOX5/SPRY2/BMP7/ANGPT2	27
GO:0048608	reproductive structure development	42/647	443/18866	2.81564e-09	1.85905e-07	1.22402e-07	SFRP1/SPP1/VEGFA/PDGFRA/SFRP2/SERPINF1/LEP/SERPINA5/ADAMTS1/MME/STC2/GATA3/INHBA/GRHL2/IGF2/WT1/KRT8/KRT19/ST14/BMPR1B/GATA2/TCF21/FST/NR2F2/PTGIS/KIT/ETNK2/ZFPM2/FGF9/ASCL2/MGST1/SPINT1/EGFR/ID4/GATA6/ALOX15B/SPINT2/DHCR24/HSD17B2/BMP7/REN/INHBB	42
GO:0048880	sensory system development	39/647	394/18866	3.14145e-09	2.04758e-07	1.34815e-07	CRYAB/VEGFA/PDGFRA/SERPINF1/ALDH1A2/GATA3/INHBA/GRHL2/WT1/MYH10/CYP1B1/VIM/THY1/COL4A1/DLL4/TUB/USH1C/KLF4/EFEMP1/BMPR1B/FGF2/FBN2/PROX1/RHOJ/ACVRL1/COL8A1/TFAP2A/FGF9/C1QA/EGFR/C3/ARHGEF15/COL5A1/CPAMD8/TFAP2B/SPRY2/CALB1/MYOM1/BMP7	39
GO:0035296	regulation of tube diameter	22/647	143/18866	3.61613e-09	2.25575e-07	1.48521e-07	KCNMA1/EDNRA/LEP/APOE/FGG/GJA5/COMP/EDN3/EDNRB/CAV1/AVPR1A/RGS2/ADRB1/ACTA2/AGT/CASR/KNG1/EGFR/BDKRB2/NPR1/CHGA/ATP1A2	22
GO:0097746	regulation of blood vessel diameter	22/647	143/18866	3.61613e-09	2.25575e-07	1.48521e-07	KCNMA1/EDNRA/LEP/APOE/FGG/GJA5/COMP/EDN3/EDNRB/CAV1/AVPR1A/RGS2/ADRB1/ACTA2/AGT/CASR/KNG1/EGFR/BDKRB2/NPR1/CHGA/ATP1A2	22
GO:0010959	regulation of metal ion transport	39/647	396/18866	3.62476e-09	2.25575e-07	1.48521e-07	DPP6/MYLK/CXCL12/RRAD/STC2/LGALS3/KCNQ1/HAMP/CORO1A/CXCR4/THY1/WNK4/CCL5/FXYD1/EDN3/PER1/CX3CL1/CAV1/BIN1/AHNAK/CD4/AGT/CASR/TF/EHD3/ATP1A1/KCNIP2/HSPA2/JPH2/ATP1B1/CNTN1/EGF/KCNE4/CXCL10/CASQ2/FXYD6/GEM/ATP1A2/APLNR	39
GO:0061458	reproductive system development	42/647	447/18866	3.67768e-09	2.25575e-07	1.48521e-07	SFRP1/SPP1/VEGFA/PDGFRA/SFRP2/SERPINF1/LEP/SERPINA5/ADAMTS1/MME/STC2/GATA3/INHBA/GRHL2/IGF2/WT1/KRT8/KRT19/ST14/BMPR1B/GATA2/TCF21/FST/NR2F2/PTGIS/KIT/ETNK2/ZFPM2/FGF9/ASCL2/MGST1/SPINT1/EGFR/ID4/GATA6/ALOX15B/SPINT2/DHCR24/HSD17B2/BMP7/REN/INHBB	42
GO:0055002	striated muscle cell development	24/647	169/18866	3.68267e-09	2.25575e-07	1.48521e-07	TPM1/VEGFA/PDGFRA/FLNC/KRT8/SORBS2/FHL2/MYH10/HAMP/KRT19/COMP/ACTC1/UCHL1/MEF2C/PROX1/RGS2/MYOZ1/AGT/CFL2/CSRP1/CAV2/CASQ2/PDLIM5/CDK1	24
GO:0035150	regulation of tube size	22/647	144/18866	4.13319e-09	2.50156e-07	1.64706e-07	KCNMA1/EDNRA/LEP/APOE/FGG/GJA5/COMP/EDN3/EDNRB/CAV1/AVPR1A/RGS2/ADRB1/ACTA2/AGT/CASR/KNG1/EGFR/BDKRB2/NPR1/CHGA/ATP1A2	22
GO:0007229	integrin-mediated signaling pathway	19/647	108/18866	4.3201e-09	2.58393e-07	1.70129e-07	DST/LIMS2/ITGA8/ADAMTS1/ITGB2/VAV3/ITGA5/THY1/FERMT2/FN1/LAMA3/ITGAX/FGR/FERMT1/ITGB6/ITGA7/PLEK/CD177/CEACAM1	19
GO:0001936	regulation of endothelial cell proliferation	25/647	184/18866	4.41454e-09	2.60971e-07	1.71826e-07	CXCL12/VEGFA/LEP/ALDH1A2/APOE/F3/TEK/IGF2/DLL4/ECM1/GATA2/FGF2/APOH/CAV1/MEF2C/PROX1/NR2F2/ACVRL1/NGFR/SPARC/XDH/KDR/CAV2/ALOX5/APLNR	25
GO:0090257	regulation of muscle system process	30/647	256/18866	4.57096e-09	2.67112e-07	1.7587e-07	KCNMA1/HSPB6/PDE9A/TPM1/CNN1/KCNQ1/HAND2/HAMP/GJA5/TACR2/KLF4/CAV1/RGS2/MYL9/BIN1/KIT/AGT/EHD3/TNNC1/ATP1A1/PPP1R12B/ATP1B1/ANXA6/CHGA/CASQ2/AIF1/CALCRL/ATP1A2/SGCA/PPARGC1A	30
GO:0060047	heart contraction	32/647	287/18866	4.80937e-09	2.7785e-07	1.8294e-07	ABCC9/HSPB7/TPM1/KCNQ1/GJA5/CXCR4/FXYD1/DES/ACTC1/EDN3/CAV1/AVPR1A/RGS2/ADRB1/BIN1/AGT/CACNA1H/EHD3/TNNC1/ATP1A1/KCNIP2/CYP2J2/MAP2K6/ATP1B1/NPR1/KCNE4/CHGA/CASQ2/KCNK3/FXYD6/SLC1A1/ATP1A2	32
GO:0048705	skeletal system morphogenesis	28/647	228/18866	5.28277e-09	3.01771e-07	1.9869e-07	SFRP1/COL1A1/PDGFRA/SFRP2/HOXA5/TEK/GRHL2/HOXD10/HOXB6/HHIP/HOXB8/MSX1/ACP5/BMPR1B/COMP/CSGALNACT1/FBN2/MEF2C/FGR/HYAL1/ALPL/BARX2/TFAP2A/ANXA6/FGF18/MMP13/BMP7/LTF	28
GO:0006874	cellular calcium ion homeostasis	42/647	456/18866	6.61792e-09	3.73491e-07	2.45911e-07	CDH5/CXCL12/EDNRA/PDGFRA/CCR5/STC2/APOE/CORO1A/CXCR4/THY1/CCL5/NOL3/GATA2/FGF2/PTGFR/EDN3/CCL28/EDNRB/CX3CL1/CAV1/AVPR1A/CD4/AGT/CASR/SYNPO/C3AR1/KNG1/S1PR1/JPH2/CAV2/ATP1B1/BDKRB2/CD36/CXCL10/ANXA6/CASQ2/CALB1/ADCY5/KCNK3/ATP1A2/APLNR/CCL21	42
GO:0003158	endothelium development	21/647	135/18866	6.68523e-09	3.73491e-07	2.45911e-07	CDH5/GSTM3/VEGFA/GJA5/CXCR4/DLL4/CLDN5/ITGAX/PROX1/NR2F2/ACVRL1/XDH/S1PR1/KDR/CXCL10/CEACAM1/FGF1/RHOB/CLDN3/MET/CLDN1	21
GO:0048732	gland development	41/647	443/18866	8.7587e-09	4.81664e-07	3.17134e-07	SFRP1/LIMS2/VEGFA/TGFBR3/PDGFRA/SERPINF1/SERPINA5/ALDH1A2/HOXA5/GATA3/ELF5/HAND2/IGF2/WT1/ELF3/HAMP/MSX1/GATA2/FGF7/PAX8/TCF21/CAV1/SOCS2/PROX1/SOSTDC1/PITX1/TDGF1/XDH/NTN4/EGFR/NFIB/ID4/GATA6/EGF/CEACAM1/FGF1/ALOX15B/BMP7/AK4/MET/CLDN1	41
GO:0007492	endoderm development	16/647	79/18866	8.81093e-09	4.81664e-07	3.17134e-07	COL7A1/ITGB2/INHBA/LAMB3/ITGA5/FN1/DUSP5/LAMA3/COL4A2/SOX7/ITGA7/COL8A1/PAX9/COL5A1/GATA6/DUSP1	16
GO:0035265	organ growth	25/647	191/18866	9.56785e-09	5.17478e-07	3.40714e-07	DDR2/TGFBR3/LEP/WT1/SORBS2/HAMP/COMP/ECM1/FGF2/FGF7/MEF2C/PROX1/RGS2/AGT/FBLN5/ZFPM2/FGF9/S1PR1/BNC2/GATA6/ANXA6/SPRY2/PDLIM5/MMP13/CDK1	25
GO:0003015	heart process	32/647	297/18866	1.10959e-08	5.93805e-07	3.90968e-07	ABCC9/HSPB7/TPM1/KCNQ1/GJA5/CXCR4/FXYD1/DES/ACTC1/EDN3/CAV1/AVPR1A/RGS2/ADRB1/BIN1/AGT/CACNA1H/EHD3/TNNC1/ATP1A1/KCNIP2/CYP2J2/MAP2K6/ATP1B1/NPR1/KCNE4/CHGA/CASQ2/KCNK3/FXYD6/SLC1A1/ATP1A2	32
GO:0097529	myeloid leukocyte migration	27/647	222/18866	1.22287e-08	6.45619e-07	4.25083e-07	CXCL12/VEGFA/LGALS3/ITGB2/VAV3/CXCL1/JAM3/CCL5/EMILIN1/EDN3/EDNRB/CX3CL1/CXCL2/KIT/CCL20/C3AR1/DPP4/CD177/CXCL10/PTPRO/CHGA/DUSP1/AIF1/RAC2/AGER/S100A14/CCL21	27
GO:0001704	formation of primary germ layer	20/647	127/18866	1.23181e-08	6.45619e-07	4.25083e-07	COL7A1/ITGA8/SFRP2/ITGB2/INHBA/ELF5/LAMB3/ITGA5/KLF4/FN1/DUSP5/LAMA3/COL4A2/SOX7/ITGA7/COL8A1/COL5A1/GATA6/DUSP1/BMP7	20
GO:0040013	negative regulation of locomotion	38/647	397/18866	1.25598e-08	6.51572e-07	4.29003e-07	SFRP1/CXCL12/TPM1/SFRP2/SERPINF1/MEOX2/APOE/GATA3/HRG/FBLN1/CYP1B1/THY1/DLL4/GSTP1/KLF4/EMILIN1/FGF2/APOH/CCL28/CX3CL1/CLDN5/MEF2C/APOD/NR2F2/ACVRL1/DPP4/SEMA3B/PTPRO/ALOX15B/RHOB/IGFBP3/SPINT2/DUSP1/AIF1/CLDN3/ANGPT2/CCL21/PPARGC1A	38
GO:0010594	regulation of endothelial cell migration	28/647	238/18866	1.37295e-08	6.93951e-07	4.56906e-07	VEGFA/SERPINF1/MEOX2/APOE/GATA3/TEK/HRG/DLL4/KLF4/GATA2/FGF2/APOH/MEF2C/PROX1/NR2F2/RHOJ/ACVRL1/TDGF1/AGT/SPARC/ANXA3/KDR/CEACAM1/FGF1/FGF18/RHOB/ANGPT2/MET	28
GO:0043270	positive regulation of ion transport	31/647	284/18866	1.38666e-08	6.93951e-07	4.56906e-07	ABCB1/MYLK/CXCL12/LEP/APOE/LGALS3/KCNQ1/THY1/TACR2/WNK4/CCL5/FXYD1/EDN3/CX3CL1/CAV1/AVPR1A/SLC34A1/CD4/AGT/CASR/EHD3/CYP4A11/KCNIP2/HSPA2/JPH2/MAP2K6/ATP1B1/CYP4F2/CNTN1/CXCL10/APLNR	31
GO:0043010	camera-type eye development	34/647	332/18866	1.39853e-08	6.93951e-07	4.56906e-07	CRYAB/VEGFA/PDGFRA/SERPINF1/ALDH1A2/GATA3/INHBA/GRHL2/WT1/MYH10/CYP1B1/VIM/THY1/COL4A1/DLL4/TUB/USH1C/KLF4/EFEMP1/BMPR1B/FGF2/FBN2/PROX1/RHOJ/ACVRL1/COL8A1/TFAP2A/EGFR/ARHGEF15/TFAP2B/SPRY2/CALB1/MYOM1/BMP7	34
GO:0050891	multicellular organismal water homeostasis	15/647	71/18866	1.40042e-08	6.93951e-07	4.56906e-07	AQP1/AQP4/SCNN1A/SCNN1B/AQP3/CLDN4/SFN/ATP6V1B1/CYP4A11/CYP4F2/TFAP2B/ADCY5/PRKAR2B/MET/CLDN1	15
GO:2000146	negative regulation of cell motility	36/647	365/18866	1.40592e-08	6.93951e-07	4.56906e-07	SFRP1/CXCL12/TPM1/SFRP2/SERPINF1/MEOX2/APOE/GATA3/HRG/FBLN1/CYP1B1/THY1/DLL4/GSTP1/KLF4/EMILIN1/FGF2/APOH/CCL28/CX3CL1/CLDN5/MEF2C/APOD/NR2F2/ACVRL1/DPP4/ALOX15B/RHOB/IGFBP3/SPINT2/DUSP1/AIF1/CLDN3/ANGPT2/CCL21/PPARGC1A	36
GO:0030323	respiratory tube development	24/647	181/18866	1.46259e-08	7.14982e-07	4.70753e-07	VEGFA/PDGFRA/ALDH1A2/HOXA5/MME/GRHL2/AGR2/HHIP/FGF2/FGF7/KLF2/TCF21/PROX1/SPARC/SPDEF/ZFPM2/FGF9/TRAF4/EGFR/NFIB/GATA6/FGF1/FGF18/SPRY2	24
GO:0030193	regulation of blood coagulation	16/647	82/18866	1.54979e-08	7.50392e-07	4.94067e-07	F11/PLAT/PDGFRA/APOE/F3/FGG/HRG/SERPING1/APOH/CAV1/SELP/KNG1/PLEK/CD36/CEACAM1/PLAU	16
GO:0002576	platelet degranulation	20/647	129/18866	1.62046e-08	7.77209e-07	5.11724e-07	A2M/VEGFA/SERPINA1/FGG/IGF2/HRG/SERPING1/FN1/ECM1/APOH/ALB/SPARC/TF/CLU/SELP/KNG1/PLEK/CD36/EGF/VWF	20
GO:0001654	eye development	37/647	384/18866	1.6438e-08	7.81035e-07	5.14243e-07	CRYAB/VEGFA/PDGFRA/SERPINF1/ALDH1A2/GATA3/INHBA/GRHL2/WT1/MYH10/CYP1B1/VIM/THY1/COL4A1/DLL4/TUB/USH1C/KLF4/EFEMP1/BMPR1B/FGF2/FBN2/PROX1/RHOJ/ACVRL1/COL8A1/TFAP2A/FGF9/EGFR/ARHGEF15/COL5A1/CPAMD8/TFAP2B/SPRY2/CALB1/MYOM1/BMP7	37
GO:0034113	heterotypic cell-cell adhesion	14/647	62/18866	1.71869e-08	8.09057e-07	5.32693e-07	ITGB2/FGG/JAM3/ITGA5/THY1/IL1RN/KLF4/ITGAX/VCAM1/ITGA7/NFASC/CD2/BMP7/AGER	14
GO:0001558	regulation of cell growth	39/647	420/18866	1.85837e-08	8.66786e-07	5.70703e-07	SFRP1/SPP1/CXCL12/CRYAB/VEGFA/SFRP2/APOE/FBP1/INHBA/FAM107A/WT1/SCGB3A1/HRG/HAMP/CXCR4/CDHR2/IGFBP4/MSX1/FN1/SFN/APBB1/CDA/SOCS2/AVPR1A/RGS2/HYAL1/ACVRL1/AGT/FBLN5/SGK1/IGFBP7/LTBP4/EGFR/SEMA3B/NPR1/CEACAM1/MAP1B/IGFBP3/KRT17	39
GO:0072503	cellular divalent inorganic cation homeostasis	43/647	492/18866	2.05055e-08	9.47727e-07	6.23995e-07	CDH5/CXCL12/EDNRA/PDGFRA/CCR5/STC2/APOE/CORO1A/CXCR4/THY1/CCL5/NOL3/GATA2/FGF2/PTGFR/EDN3/CCL28/EDNRB/CX3CL1/CAV1/AVPR1A/CD4/AGT/CASR/SYNPO/C3AR1/KNG1/S1PR1/JPH2/CAV2/ATP1B1/BDKRB2/CD36/CXCL10/ANXA6/MT2A/CASQ2/CALB1/ADCY5/KCNK3/ATP1A2/APLNR/CCL21	43
GO:0001935	endothelial cell proliferation	25/647	199/18866	2.20994e-08	1.01219e-06	6.66441e-07	CXCL12/VEGFA/LEP/ALDH1A2/APOE/F3/TEK/IGF2/DLL4/ECM1/GATA2/FGF2/APOH/CAV1/MEF2C/PROX1/NR2F2/ACVRL1/NGFR/SPARC/XDH/KDR/CAV2/ALOX5/APLNR	25
GO:0031099	regeneration	25/647	201/18866	2.70451e-08	1.22765e-06	8.08302e-07	SPP1/CXCL12/TGFBR3/NEFL/LCP1/NR0B2/HAMP/JAM3/THY1/GSTP1/KLF4/FOLR1/KLF5/APOD/MYOZ1/ANXA3/EGFR/MATN2/GSN/NNMT/MAP1B/CDK1/ANGPT2/CLDN1/SGCA	25
GO:0048738	cardiac muscle tissue development	27/647	231/18866	2.86041e-08	1.28693e-06	8.47332e-07	TPM1/VEGFA/TGFBR3/PDGFRA/ALDH1A2/WT1/SORBS2/FHL2/MYH10/HAMP/GJA5/DLL4/ACTC1/FGF2/MEF2C/PROX1/RGS2/AGT/ZFPM2/TNNC1/FGF9/S1PR1/JPH2/GATA6/PDLIM5/BMP7/CDK1	27
GO:0001954	positive regulation of cell-matrix adhesion	13/647	55/18866	3.10156e-08	1.38318e-06	9.10706e-07	SFRP1/SDC4/VEGFA/TEK/MYOC/HRG/THY1/CCL28/CX3CL1/FERMT1/KDR/CD36/CCL21	13
GO:0097756	negative regulation of blood vessel diameter	16/647	86/18866	3.16008e-08	1.39703e-06	9.19823e-07	EDNRA/LEP/FGG/GJA5/COMP/EDN3/EDNRB/CAV1/AVPR1A/ACTA2/AGT/CASR/EGFR/BDKRB2/CHGA/ATP1A2	16
GO:0035987	endodermal cell differentiation	12/647	46/18866	3.19553e-08	1.40052e-06	9.22122e-07	COL7A1/ITGB2/INHBA/LAMB3/ITGA5/FN1/LAMA3/COL4A2/ITGA7/COL8A1/COL5A1/GATA6	12
GO:0060541	respiratory system development	25/647	204/18866	3.64225e-08	1.58267e-06	1.04205e-06	VEGFA/PDGFRA/ALDH1A2/HOXA5/MME/GRHL2/WT1/AGR2/HHIP/MSC/FGF2/FGF7/KLF2/TCF21/PROX1/SPARC/SPDEF/ZFPM2/FGF9/EGFR/NFIB/GATA6/FGF1/FGF18/SPRY2	25
GO:0031581	hemidesmosome assembly	7/647	12/18866	3.68331e-08	1.58515e-06	1.04368e-06	DST/LAMC2/KRT5/LAMB3/LAMA3/COL17A1/KRT14	7
GO:1903524	positive regulation of blood circulation	15/647	76/18866	3.71032e-08	1.58515e-06	1.04368e-06	TPM1/KCNQ1/FGG/GJA5/EDN3/CAV1/AVPR1A/RGS2/ADRB1/CASR/ATP1A1/EGFR/CHGA/SLC1A1/ATP1A2	15
GO:0007159	leukocyte cell-cell adhesion	35/647	364/18866	4.24418e-08	1.79812e-06	1.1839e-06	SDC4/CXCL12/HLA-DPA1/DTX1/HLA-DPB1/LEP/LGALS3/GATA3/ITGB2/IGF2/CORO1A/ITGA5/THY1/CCL5/KLF4/CCL28/CAV1/GPNMB/VTCN1/VCAM1/CD4/ARG2/IDO1/SELP/JAM2/DPP4/CD177/CEACAM1/ALOX5/SELPLG/AIF1/BMP7/RAC2/AGER/CCL21	35
GO:0030324	lung development	23/647	177/18866	4.28258e-08	1.79939e-06	1.18474e-06	VEGFA/PDGFRA/ALDH1A2/HOXA5/MME/GRHL2/AGR2/HHIP/FGF2/FGF7/KLF2/TCF21/PROX1/SPARC/SPDEF/ZFPM2/FGF9/EGFR/NFIB/GATA6/FGF1/FGF18/SPRY2	23
GO:0048568	embryonic organ development	40/647	451/18866	4.33062e-08	1.80466e-06	1.18821e-06	ITGA8/VEGFA/PDGFRA/ALDH1A2/HOXA5/GATA3/GRHL2/HAND2/IGF2/HOXD10/HOXB6/KRT8/GJA5/KRT19/USH1C/ST14/HOXB8/EFEMP1/MSX1/FOLR1/GATA2/FBN2/PAX8/TCF21/MEF2C/PROX1/NR2F2/HYAL1/KIT/ATP6V1B1/ZFPM2/TFAP2A/FGF9/ASCL2/KDR/SPINT1/EGFR/SPRY2/SPINT2/BMP7	40
GO:0050818	regulation of coagulation	16/647	88/18866	4.44078e-08	1.83552e-06	1.20853e-06	F11/PLAT/PDGFRA/APOE/F3/FGG/HRG/SERPING1/APOH/CAV1/SELP/KNG1/PLEK/CD36/CEACAM1/PLAU	16
GO:0048771	tissue remodeling	23/647	178/18866	4.76246e-08	1.93833e-06	1.27622e-06	SFRP1/SPP1/CTSK/DDR2/LEP/HAND2/ELF3/HRG/GJA5/CSPG4/DLL4/ACP5/CAV1/GPNMB/MEF2C/ACVRL1/AGT/TF/S1PR1/EGFR/CEACAM1/RAC2/AGER	23
GO:0071560	cellular response to transforming growth factor beta stimulus	28/647	252/18866	4.76577e-08	1.93833e-06	1.27622e-06	SFRP1/CDH5/ITGA8/TGFBR3/COL1A1/RASL11B/FERMT2/TGFB1I1/CDKN1C/EMILIN1/FOLR1/FBN2/CLDN5/CAV1/MEF2C/COL4A2/CIDEA/ACVRL1/FERMT1/NR3C1/LTBP4/CAV2/VEPH1/COL1A2/SPRY2/CGN/CLDN1/PPARGC1A	28
GO:0010038	response to metal ion	35/647	366/18866	4.86618e-08	1.96346e-06	1.29277e-06	KCNMA1/AQP1/SERPINF1/FBP1/HAAO/FGG/HAMP/PKLR/AQP3/APBB1/SOD3/CAV1/MEF2C/KIT/SLC34A1/KRT14/SPARC/CACNA1H/CASR/TF/TNNC1/TFAP2A/KCNIP2/C1QA/EGFR/GSN/AOC1/DUSP1/MT2A/CASQ2/FABP4/KCNK3/CDK1/CLDN1/PPARGC1A	35
GO:0016049	cell growth	42/647	490/18866	5.20633e-08	2.08417e-06	1.37224e-06	SFRP1/SPP1/CXCL12/CRYAB/VEGFA/SFRP2/CYFIP2/APOE/FBP1/INHBA/FAM107A/WT1/SORBS2/SCGB3A1/HRG/HAMP/CXCR4/CDHR2/IGFBP4/MSX1/FN1/SFN/APBB1/CDA/SOCS2/AVPR1A/RGS2/HYAL1/ACVRL1/AGT/FBLN5/SGK1/IGFBP7/LTBP4/EGFR/SEMA3B/NPR1/CEACAM1/MAP1B/IGFBP3/PDLIM5/KRT17	42
GO:0042310	vasoconstriction	15/647	78/18866	5.3541e-08	2.09842e-06	1.38162e-06	EDNRA/LEP/FGG/GJA5/COMP/EDN3/EDNRB/CAV1/AVPR1A/ACTA2/AGT/CASR/EGFR/BDKRB2/ATP1A2	15
GO:0061045	negative regulation of wound healing	15/647	78/18866	5.3541e-08	2.09842e-06	1.38162e-06	F11/PLAT/PDGFRA/APOE/FGG/HRG/SERPING1/FGF2/APOH/KNG1/CEACAM1/ALOX5/AGER/PLAU/CLDN3	15
GO:0010632	regulation of epithelial cell migration	31/647	301/18866	5.36574e-08	2.09842e-06	1.38162e-06	VEGFA/SERPINF1/MEOX2/APOE/GATA3/TEK/HRG/DLL4/KLF4/GATA2/FGF2/FGF7/APOH/MEF2C/PROX1/NR2F2/HYAL1/RHOJ/ACVRL1/TDGF1/AGT/SPARC/ANXA3/RAB25/KDR/CEACAM1/FGF1/FGF18/RHOB/ANGPT2/MET	31
GO:0090092	regulation of transmembrane receptor protein serine/threonine kinase signaling pathway	28/647	254/18866	5.64669e-08	2.19037e-06	1.44217e-06	SFRP1/CDH5/ITGA8/TGFBR3/SFRP2/RASL11B/INHBA/TGFB1I1/CDKN1C/MSX1/EMILIN1/FOLR1/FBN2/CAV1/FST/CIDEA/SOSTDC1/ACVRL1/FERMT1/FGF9/LTBP4/CAV2/VEPH1/TFAP2B/SPRY2/BMP7/INHBB/TTK	28
GO:2000181	negative regulation of blood vessel morphogenesis	24/647	194/18866	5.68704e-08	2.19037e-06	1.44217e-06	SERPINF1/MEOX2/ADAMTS1/HOXA5/TEK/HRG/DLL4/KLF4/THBS2/EMILIN1/APOH/KLF2/CLDN5/COL4A2/AGT/NGFR/SPARC/FBLN5/XDH/NPR1/CXCL10/ALOX5/SPRY2/ANGPT2	24
GO:0019932	second-messenger-mediated signaling	40/647	456/18866	5.84446e-08	2.23408e-06	1.47095e-06	PDE9A/VEGFA/AQP1/CCR5/APOE/FHL2/PTHLH/CXCR4/PTGFR/EDN3/EDNRB/RAMP2/VCAM1/AVPR1A/RGS2/ADRB1/MYOZ1/CD4/AGT/CCL20/SELP/S1PR1/KDR/PLEK/CALML3/EGFR/JPH2/ATP1B1/NPR1/CD36/CXCL10/CHGA/CASQ2/ADCY5/PRKAR2B/RCAN1/CALCRL/ATP1A2/CD22/APLNR	40
GO:0030104	water homeostasis	15/647	79/18866	6.40246e-08	2.42911e-06	1.59936e-06	AQP1/AQP4/SCNN1A/SCNN1B/AQP3/CLDN4/SFN/ATP6V1B1/CYP4A11/CYP4F2/TFAP2B/ADCY5/PRKAR2B/MET/CLDN1	15
GO:0008016	regulation of heart contraction	28/647	256/18866	6.67748e-08	2.51469e-06	1.6557e-06	ABCC9/HSPB7/TPM1/KCNQ1/GJA5/FXYD1/DES/EDN3/CAV1/AVPR1A/RGS2/ADRB1/BIN1/AGT/CACNA1H/EHD3/ATP1A1/KCNIP2/CYP2J2/ATP1B1/NPR1/KCNE4/CHGA/CASQ2/KCNK3/FXYD6/SLC1A1/ATP1A2	28
GO:0002685	regulation of leukocyte migration	25/647	212/18866	7.82245e-08	2.92422e-06	1.92534e-06	CXCL12/VEGFA/LGALS3/JAM3/THY1/TNFRSF18/CCL5/EMILIN1/ECM1/EDN3/CCL28/CX3CL1/APOD/CCL20/SELP/C3AR1/JAM2/DPP4/CXCL10/DUSP1/AIF1/RAC2/AGER/S100A14/CCL21	25
GO:0071559	response to transforming growth factor beta	28/647	258/18866	7.88137e-08	2.92474e-06	1.92568e-06	SFRP1/CDH5/ITGA8/TGFBR3/COL1A1/RASL11B/FERMT2/TGFB1I1/CDKN1C/EMILIN1/FOLR1/FBN2/CLDN5/CAV1/MEF2C/COL4A2/CIDEA/ACVRL1/FERMT1/NR3C1/LTBP4/CAV2/VEPH1/COL1A2/SPRY2/CGN/CLDN1/PPARGC1A	28
GO:0060485	mesenchyme development	30/647	290/18866	7.97464e-08	2.9379e-06	1.93435e-06	SFRP1/EDNRA/TGFBR3/COL1A1/SFRP2/ALDH1A2/HOXA5/GATA3/HAND2/WT1/TGFB1I1/MSX1/FN1/FOLR1/ACTC1/EDN3/EDNRB/TCF21/MEOX1/MEF2C/ACVRL1/ACTA2/ZFPM2/FGF9/ACTG2/SEMA3B/BNC2/ANXA6/SPRY2/BMP7	30
GO:0072006	nephron development	20/647	143/18866	9.52875e-08	3.48519e-06	2.29469e-06	VEGFA/PDGFRA/GATA3/TEK/WT1/WNK4/FGF2/PAX8/TCF21/MEF2C/ACTA2/AGT/ENPEP/EGR1/PTPRO/FGF1/TFAP2B/CALB1/BMP7/ANGPT2	20
GO:1903035	negative regulation of response to wounding	16/647	93/18866	9.9628e-08	3.61792e-06	2.38208e-06	F11/SPP1/PLAT/PDGFRA/APOE/FGG/HRG/SERPING1/FGF2/APOH/KNG1/CEACAM1/ALOX5/AGER/PLAU/CLDN3	16
GO:0006469	negative regulation of protein kinase activity	27/647	246/18866	1.06591e-07	3.84331e-06	2.53048e-06	SFRP1/SFRP2/PPP1R1B/APOE/SH3BP5/THY1/GSTP1/CDKN1C/DUSP5/CBLC/SFN/PLK1/UCHL1/CAV1/RGS2/NR2F2/AGT/RASIP1/CEACAM1/PTPRO/TRIB3/SPRY2/DUSP1/FABP4/BMP7/PRKAR2B/PTPRH	27
GO:1900047	negative regulation of hemostasis	12/647	51/18866	1.11432e-07	3.98958e-06	2.62679e-06	F11/PLAT/PDGFRA/APOE/FGG/HRG/SERPING1/COMP/APOH/KNG1/CEACAM1/PLAU	12
GO:0006937	regulation of muscle contraction	22/647	173/18866	1.2398e-07	4.40778e-06	2.90213e-06	KCNMA1/HSPB6/TPM1/CNN1/KCNQ1/GJA5/TACR2/CAV1/RGS2/MYL9/BIN1/KIT/EHD3/TNNC1/ATP1A1/PPP1R12B/ATP1B1/ANXA6/CHGA/CASQ2/CALCRL/ATP1A2	22
GO:0048545	response to steroid hormone	33/647	346/18866	1.25375e-07	4.42642e-06	2.91441e-06	SFRP1/S100B/SPP1/AQP1/COL1A1/SERPINF1/HSD11B2/FAM107A/NEFL/IL1RN/GSTP1/CLDN4/PER1/ESRRG/TCF21/CAV1/RAMP2/AVPR1A/NR3C2/ALPL/RXRG/SPARC/NR3C1/ANXA3/ATP1A1/IGFBP7/EGFR/DUSP1/AIF1/BMP7/AGXT/ATP1A2/CLDN1	33
GO:0007369	gastrulation	23/647	189/18866	1.45348e-07	5.0962e-06	3.3554e-06	SFRP1/COL7A1/ITGA8/SFRP2/ITGB2/INHBA/ELF5/LAMB3/ITGA5/IL1RN/KLF4/FN1/DUSP5/LAMA3/COL4A2/SOX7/ITGA7/COL8A1/COL5A1/GATA6/DUSP1/BMP7/APLNR	23
GO:0050680	negative regulation of epithelial cell proliferation	22/647	175/18866	1.52235e-07	5.30112e-06	3.49032e-06	SFRP1/LIMS2/TGFBR3/SFRP2/SERPINF1/APOE/GATA3/DLL4/CDKN1C/SFN/APOH/CAV1/MEF2C/NR2F2/ACVRL1/NGFR/SPARC/XDH/CAV2/NFIB/CEACAM1/ALOX5	22
GO:0031667	response to nutrient levels	40/647	473/18866	1.55812e-07	5.38875e-06	3.54802e-06	SFRP1/SPP1/KRT20/C2/COL1A1/SFRP2/LEP/ALDH1A2/STC2/APOE/HSD11B2/FAM107A/HAMP/PKLR/GSTP1/AQP3/FOLR1/CCL28/ALB/PROX1/GPT/LDLR/ADRB1/G6PC/SLC34A1/CD4/ALPL/LPL/SPARC/CASR/EGFR/GSN/CXCL10/AOC1/SLC2A1/MAP1B/BMP7/INHBB/MMP7/PPARGC1A	40
GO:0030336	negative regulation of cell migration	33/647	350/18866	1.64044e-07	5.63514e-06	3.71024e-06	SFRP1/CXCL12/TPM1/SFRP2/SERPINF1/MEOX2/APOE/HRG/CYP1B1/THY1/DLL4/GSTP1/KLF4/EMILIN1/FGF2/APOH/CCL28/CX3CL1/CLDN5/MEF2C/APOD/NR2F2/ACVRL1/DPP4/ALOX15B/RHOB/IGFBP3/DUSP1/AIF1/CLDN3/ANGPT2/CCL21/PPARGC1A	33
GO:0016525	negative regulation of angiogenesis	23/647	192/18866	1.93963e-07	6.61817e-06	4.35749e-06	SERPINF1/MEOX2/ADAMTS1/HOXA5/TEK/HRG/DLL4/KLF4/THBS2/EMILIN1/APOH/KLF2/CLDN5/COL4A2/AGT/NGFR/SPARC/FBLN5/NPR1/CXCL10/ALOX5/SPRY2/ANGPT2	23
GO:0043114	regulation of vascular permeability	11/647	45/18866	2.48755e-07	8.43113e-06	5.55116e-06	CDH5/VEGFA/APOE/TEK/TACR2/CLDN5/RAMP2/AKAP12/BDKRB2/NPR1/CEACAM1	11
GO:0018108	peptidyl-tyrosine phosphorylation	34/647	374/18866	2.53455e-07	8.53353e-06	5.61858e-06	SFRP1/DDR2/VEGFA/PDGFRA/SFRP2/LEP/ITGB2/TEK/IGF2/HRG/SH3BP5/CSPG4/ITGA5/THY1/TNFRSF18/CCL5/EFEMP1/CBLC/FGF7/CAV1/FGR/KIT/CD4/TDGF1/AGT/KDR/EGFR/MAP2K6/CNTN1/CD36/EGF/AFAP1L2/TTK/MET	34
GO:0051480	regulation of cytosolic calcium ion concentration	33/647	357/18866	2.59626e-07	8.68381e-06	5.71753e-06	EDNRA/PDGFRA/CCR5/CORO1A/CXCR4/THY1/NOL3/GATA2/FGF2/PTGFR/CCL28/EDNRB/CX3CL1/CAV1/AVPR1A/CD4/AGT/SYNPO/C3AR1/KNG1/S1PR1/JPH2/CAV2/BDKRB2/CD36/CXCL10/CASQ2/CALB1/ADCY5/KCNK3/ATP1A2/APLNR/CCL21	33
GO:0001952	regulation of cell-matrix adhesion	18/647	125/18866	2.66035e-07	8.84002e-06	5.82038e-06	SFRP1/SDC4/VEGFA/TEK/MYOC/FAM107A/HRG/THY1/CCL28/CX3CL1/APOD/ACVRL1/FERMT1/MMP12/KDR/CD36/PLAU/CCL21	18
GO:0003007	heart morphogenesis	27/647	258/18866	2.81402e-07	9.28992e-06	6.1166e-06	TPM1/VEGFA/TGFBR3/SFRP2/ALDH1A2/ADAMTS1/GATA3/TEK/GRHL2/HAND2/CPE/FHL2/GJA5/DLL4/MSX1/FOLR1/ACTC1/CLDN5/MEF2C/PROX1/ACVRL1/ZFPM2/TNNC1/S1PR1/COL5A1/GATA6/BMP7	27
GO:0043405	regulation of MAP kinase activity	32/647	342/18866	3.00175e-07	9.84574e-06	6.48256e-06	SFRP1/VEGFA/SFRP2/APOE/CXCR4/CSPG4/GSTP1/TPD52L1/DUSP5/CBLC/FGF2/EDN3/UCHL1/CAV1/MUC20/RGS2/KIT/IGFBP6/TDGF1/AGT/TF/EGFR/MAP2K6/EGF/FGF1/FGF18/TRIB3/SPRY2/DUSP1/BMP7/AGER/CDK1	32
GO:0018212	peptidyl-tyrosine modification	34/647	377/18866	3.05727e-07	9.96357e-06	6.56014e-06	SFRP1/DDR2/VEGFA/PDGFRA/SFRP2/LEP/ITGB2/TEK/IGF2/HRG/SH3BP5/CSPG4/ITGA5/THY1/TNFRSF18/CCL5/EFEMP1/CBLC/FGF7/CAV1/FGR/KIT/CD4/TDGF1/AGT/KDR/EGFR/MAP2K6/CNTN1/CD36/EGF/AFAP1L2/TTK/MET	34
GO:0032355	response to estradiol	19/647	141/18866	3.59889e-07	1.1654e-05	7.67313e-06	SFRP1/CRYAB/COL1A1/LEP/ALDH1A2/GSTP1/PTGFR/RAMP2/SOCS2/NR2F2/SLC34A1/CD4/AGT/EGFR/MAP1B/DUSP1/BMP7/GGT1/PPARGC1A	19
GO:0048754	branching morphogenesis of an epithelial tube	20/647	155/18866	3.63946e-07	1.17108e-05	7.71052e-06	EDNRA/VEGFA/SFRP2/HOXA5/WT1/HHIP/COL4A1/DLL4/FGF2/PAX8/TCF21/AGT/CASR/RASIP1/KDR/EGF/FGF1/SPRY2/BMP7/MET	20
GO:0045123	cellular extravasation	13/647	67/18866	3.71477e-07	1.18779e-05	7.82056e-06	CXCL12/LEP/ITGB2/THY1/CCL28/CX3CL1/VCAM1/SELP/JAM2/CD177/SELPLG/AGER/CCL21	13
GO:2000377	regulation of reactive oxygen species metabolic process	23/647	200/18866	4.06139e-07	1.29051e-05	8.49685e-06	CRYAB/LEP/ITGB2/CYP1B1/GSTP1/KLF4/ACP5/KLF2/CAV1/PTGIS/AGT/FBLN5/ARG2/CLU/TFAP2A/XDH/EGFR/CD177/CD36/ALOX5/AIF1/BMP7/RAC2	23
GO:0008202	steroid metabolic process	31/647	332/18866	4.8086e-07	1.51844e-05	9.99762e-06	SPP1/CUBN/PDGFRA/SULT2B1/LEP/APOE/HSD11B2/ACADL/LCAT/NR0B2/CYP1B1/PROX1/LDLR/G6PC/KIT/GC/AGT/CACNA1H/CYP2B6/ATP1A1/IGFBP7/EGR1/HMGCS2/LIPE/FGF1/DHCR24/CYP2E1/HSD17B2/APOF/CYP27A1/PPARGC1A	31
GO:0035051	cardiocyte differentiation	20/647	158/18866	4.97588e-07	1.55464e-05	1.0236e-05	VEGFA/TGFBR3/PDGFRA/HAND2/WT1/SORBS2/FHL2/MYH10/HAMP/FOLR1/ACTC1/MEF2C/PROX1/RGS2/AGT/EGFR/GATA6/PDLIM5/BMP7/CDK1	20
GO:0030282	bone mineralization	17/647	117/18866	4.99992e-07	1.55464e-05	1.0236e-05	DDR2/LEP/PTHLH/BMPR1B/COMP/ECM1/FBN2/GPNMB/MEF2C/FGR/TFAP2A/S1PR1/COL1A2/ALOX5/MMP13/BMP7/LTF	17
GO:0050921	positive regulation of chemotaxis	19/647	144/18866	5.01497e-07	1.55464e-05	1.0236e-05	CXCL12/VEGFA/F3/CXCR4/CCL5/FGF2/EDN3/CASR/C3AR1/S1PR1/KDR/CXCL10/FGF18/AIF1/RAC2/AGER/MET/S100A14/CCL21	19
GO:0048660	regulation of smooth muscle cell proliferation	21/647	173/18866	5.25908e-07	1.62044e-05	1.06691e-05	NPR3/TPM1/ADAMTS1/CNN1/GSTP1/CCL5/KLF4/FGF2/CX3CL1/MEF2C/APOD/AGT/PDE1A/FGF9/S1PR1/EGFR/NPR1/IGFBP3/AIF1/CALCRL/PPARGC1A	21
GO:0003206	cardiac chamber morphogenesis	18/647	131/18866	5.43373e-07	1.66416e-05	1.0957e-05	TPM1/TGFBR3/SFRP2/ADAMTS1/GATA3/TEK/GRHL2/HAND2/CPE/FHL2/GJA5/DLL4/MEF2C/PROX1/ZFPM2/TNNC1/GATA6/BMP7	18
GO:0032970	regulation of actin filament-based process	35/647	405/18866	5.64786e-07	1.71938e-05	1.13206e-05	SFRP1/SVIL/SDC4/CXCL12/TPM1/PDGFRA/CYFIP2/TEK/MYOC/FAM107A/SPTBN2/HRG/GJA5/JAM3/CORO1A/CX3CL1/CAV1/MEF2C/PROX1/BIN1/SYNPO/CFL2/TNNC1/ATP1A1/S1PR1/PLEK/ARHGEF15/GSN/FSCN1/RHOB/SCIN/RAC2/ATP1A2/MET/CCL21	35
GO:0033673	negative regulation of kinase activity	27/647	268/18866	6.01188e-07	1.81931e-05	1.19785e-05	SFRP1/SFRP2/PPP1R1B/APOE/SH3BP5/THY1/GSTP1/CDKN1C/DUSP5/CBLC/SFN/PLK1/UCHL1/CAV1/RGS2/NR2F2/AGT/RASIP1/CEACAM1/PTPRO/TRIB3/SPRY2/DUSP1/FABP4/BMP7/PRKAR2B/PTPRH	27
GO:0048659	smooth muscle cell proliferation	21/647	175/18866	6.37454e-07	1.91764e-05	1.2626e-05	NPR3/TPM1/ADAMTS1/CNN1/GSTP1/CCL5/KLF4/FGF2/CX3CL1/MEF2C/APOD/AGT/PDE1A/FGF9/S1PR1/EGFR/NPR1/IGFBP3/AIF1/CALCRL/PPARGC1A	21
GO:0051924	regulation of calcium ion transport	26/647	253/18866	6.63044e-07	1.98289e-05	1.30556e-05	MYLK/CXCL12/RRAD/STC2/LGALS3/CORO1A/CXCR4/THY1/CCL5/CX3CL1/CAV1/BIN1/AHNAK/CD4/AGT/CASR/EHD3/HSPA2/JPH2/ATP1B1/EGF/CXCL10/CASQ2/GEM/ATP1A2/APLNR	26
GO:0060349	bone morphogenesis	15/647	94/18866	6.85894e-07	2.02273e-05	1.33179e-05	COL1A1/SFRP2/TEK/MSX1/ACP5/BMPR1B/COMP/CSGALNACT1/MEF2C/ALPL/TFAP2A/ANXA6/FGF18/MMP13/LTF	15
GO:0007043	cell-cell junction assembly	19/647	147/18866	6.9228e-07	2.02273e-05	1.33179e-05	CDH5/GRHL2/GJA5/JAM3/CLDN4/CLDN8/CLDN5/CAV1/RAMP2/AGT/CDH6/UGT8/NFASC/FSCN1/PTPRO/CLDN3/CRB3/CLDN1/CLDN16	19
GO:0044409	entry into host	19/647	147/18866	6.9228e-07	2.02273e-05	1.33179e-05	CCR5/CXCR4/ITGA5/NCAM1/KRT6A/CAV1/LDLR/HYAL1/CD4/HAVCR1/ITGB6/DPP4/EGFR/CAV2/GSN/SELPLG/CDK1/MET/CLDN1	19
GO:0051384	response to glucocorticoid	19/647	147/18866	6.9228e-07	2.02273e-05	1.33179e-05	S100B/AQP1/SERPINF1/HSD11B2/FAM107A/NEFL/IL1RN/GSTP1/AVPR1A/ALPL/SPARC/NR3C1/ANXA3/IGFBP7/EGFR/DUSP1/AIF1/AGXT/CLDN1	19
GO:0045926	negative regulation of growth	26/647	254/18866	7.15261e-07	2.06893e-05	1.36221e-05	SFRP1/SPP1/CRYAB/SFRP2/STC2/FBP1/INHBA/WT1/SCGB3A1/HRG/CDHR2/MSX1/APBB1/CDA/SOCS2/RGS2/ADRB1/MYOZ1/HYAL1/ACVRL1/AGT/SEMA3B/NPR1/ALOX15B/MT2A/PLAC8	26
GO:0021700	developmental maturation	28/647	287/18866	7.16229e-07	2.06893e-05	1.36221e-05	CDH5/NR4A2/VEGFA/LEP/ALDH1A2/HOXA5/GATA3/MYOC/FGG/NEFL/GATA2/KLF2/EDNRB/CX3CL1/CDC20/ACVRL1/FERMT1/NTN4/S1PR1/KCNIP2/C1QA/C3/ARHGEF15/NFASC/MAP1B/REN/LTF/CCL21	28
GO:0097755	positive regulation of blood vessel diameter	12/647	60/18866	7.40684e-07	2.12748e-05	1.40076e-05	KCNMA1/LEP/APOE/GJA5/EDNRB/RGS2/ADRB1/AGT/CASR/KNG1/EGFR/BDKRB2	12
GO:0033627	cell adhesion mediated by integrin	13/647	71/18866	7.5007e-07	2.14234e-05	1.41054e-05	SFRP2/ITGB2/HRG/CYP1B1/JAM3/MUC1/ITGA5/CCL5/FERMT1/ITGB6/DPP4/PLAU/CCL21	13
GO:0071901	negative regulation of protein serine/threonine kinase activity	19/647	148/18866	7.69264e-07	2.17488e-05	1.43197e-05	SFRP1/SFRP2/APOE/GSTP1/CDKN1C/DUSP5/CBLC/SFN/PLK1/UCHL1/CAV1/RGS2/NR2F2/AGT/RASIP1/SPRY2/DUSP1/BMP7/PRKAR2B	19
GO:0007204	positive regulation of cytosolic calcium ion concentration	30/647	322/18866	7.70022e-07	2.17488e-05	1.43197e-05	EDNRA/PDGFRA/CCR5/CORO1A/CXCR4/THY1/NOL3/GATA2/FGF2/PTGFR/CCL28/EDNRB/CX3CL1/CAV1/AVPR1A/CD4/AGT/SYNPO/C3AR1/KNG1/S1PR1/JPH2/BDKRB2/CD36/CXCL10/CASQ2/ADCY5/ATP1A2/APLNR/CCL21	30
GO:0070293	renal absorption	7/647	17/18866	7.78287e-07	2.18608e-05	1.43934e-05	KCNQ1/SLC15A2/AQP3/WNK4/CLDN4/SGK1/GSN	7
GO:0030195	negative regulation of blood coagulation	11/647	50/18866	7.83234e-07	2.18789e-05	1.44054e-05	F11/PLAT/PDGFRA/APOE/FGG/HRG/SERPING1/APOH/KNG1/CEACAM1/PLAU	11
GO:0003073	regulation of systemic arterial blood pressure	15/647	95/18866	7.89097e-07	2.19222e-05	1.44339e-05	TPM1/MME/HSD11B2/KLK1/GJA5/EDN3/AVPR1A/ADRB1/NR2F2/AGT/ENPEP/CYP4A11/CYP4F2/PTPRO/REN	15
GO:0051047	positive regulation of secretion	31/647	340/18866	8.04947e-07	2.2241e-05	1.46438e-05	SPP1/SDC4/CXCL12/HLA-F/AQP1/LEP/ITGB2/INHBA/FGG/NR0B2/MYH10/TACR2/APBB1/GATA2/EDN3/EDNRB/AVPR1A/FGR/GAPDH/AGT/CACNA1H/CASR/CYP4A11/EGFR/CD177/MAP2K6/CYP4F2/NPR1/SCIN/MYOM1/INHBB	31
GO:0031214	biomineral tissue development	20/647	163/18866	8.23059e-07	2.2497e-05	1.48123e-05	SPP1/DDR2/COL1A1/LEP/PTHLH/BMPR1B/COMP/ECM1/FBN2/GPNMB/MEF2C/FGR/ALPL/TFAP2A/S1PR1/COL1A2/ALOX5/MMP13/BMP7/LTF	20
GO:0110148	biomineralization	20/647	163/18866	8.23059e-07	2.2497e-05	1.48123e-05	SPP1/DDR2/COL1A1/LEP/PTHLH/BMPR1B/COMP/ECM1/FBN2/GPNMB/MEF2C/FGR/ALPL/TFAP2A/S1PR1/COL1A2/ALOX5/MMP13/BMP7/LTF	20
GO:0033622	integrin activation	8/647	24/18866	8.28312e-07	2.25195e-05	1.48271e-05	CXCL12/JAM3/FERMT2/FN1/CX3CL1/SELP/RASIP1/PLEK	8
GO:0051897	positive regulation of protein kinase B signaling	21/647	178/18866	8.45766e-07	2.28717e-05	1.5059e-05	PDGFRA/LEP/GATA3/F3/TEK/MYOC/IGF2/F10/FGF2/FGF7/CX3CL1/KIT/FGF9/EGFR/EGF/FGF1/FGF18/SPRY2/RAC2/MET/CCL21	21
GO:0090303	positive regulation of wound healing	12/647	61/18866	8.93632e-07	2.40382e-05	1.58271e-05	MYLK/F3/HRG/CXCR4/CLDN4/APOH/DUOX1/SELP/PLEK/CD36/CLDN3/CLDN1	12
GO:0031960	response to corticosteroid	20/647	164/18866	9.07853e-07	2.42922e-05	1.59943e-05	S100B/AQP1/COL1A1/SERPINF1/HSD11B2/FAM107A/NEFL/IL1RN/GSTP1/AVPR1A/ALPL/SPARC/NR3C1/ANXA3/IGFBP7/EGFR/DUSP1/AIF1/AGXT/CLDN1	20
GO:0070371	ERK1 and ERK2 cascade	30/647	325/18866	9.35601e-07	2.48508e-05	1.63621e-05	PDGFRA/APOE/TEK/HAND2/FGG/FBLN1/GSTP1/CCL5/KLF4/FN1/EMILIN1/FGF2/CX3CL1/GPNMB/CD4/AGT/CASR/TF/CCL20/AKAP12/KDR/EGFR/CD36/EGF/CEACAM1/FGF18/SPRY2/DUSP1/AGER/CCL21	30
GO:0006939	smooth muscle contraction	16/647	109/18866	9.38503e-07	2.48508e-05	1.63621e-05	KCNMA1/MYLK/EDNRA/CNN1/TACR2/COMP/EDN3/EDNRB/CAV1/RGS2/KIT/ACTA2/AGT/BDKRB2/CALCRL/ATP1A2	16
GO:0033002	muscle cell proliferation	25/647	244/18866	1.14682e-06	3.02094e-05	1.98903e-05	NPR3/TPM1/TGFBR3/ADAMTS1/CNN1/GSTP1/CCL5/KLF4/FGF2/CX3CL1/MEF2C/APOD/AGT/ZFPM2/PDE1A/FGF9/S1PR1/EGFR/NPR1/GATA6/IGFBP3/AIF1/CALCRL/CDK1/PPARGC1A	25
GO:0051894	positive regulation of focal adhesion assembly	8/647	25/18866	1.18163e-06	3.09659e-05	2.03883e-05	SFRP1/SDC4/VEGFA/TEK/MYOC/HRG/THY1/KDR	8
GO:0001894	tissue homeostasis	26/647	261/18866	1.20111e-06	3.1315e-05	2.06182e-05	CDH5/SPP1/CTSK/CUBN/VEGFA/ZG16B/PIGR/JAM3/CORO1A/TUB/USH1C/ACP5/GATA2/ALB/CLDN5/TF/JAM2/S1PR1/EGFR/MUC13/SLC2A1/SLC1A1/RAC2/CLDN3/CLDN1/LTF	26
GO:0060538	skeletal muscle organ development	20/647	168/18866	1.33277e-06	3.45704e-05	2.27616e-05	S100B/SVIL/MEOX2/HLF/WT1/HOXD10/ASB2/ANKRD2/MSC/KLF5/TCF21/CAV1/MEF2C/NR2F2/MYOZ1/PITX1/CFL2/CAV2/EGR1/MYOM1	20
GO:0022407	regulation of cell-cell adhesion	36/647	439/18866	1.35235e-06	3.49003e-05	2.29788e-05	SDC4/CXCL12/HLA-DPA1/VEGFA/DTX1/HLA-DPB1/LEP/LGALS3/GATA3/ITGB2/FGG/IGF2/CORO1A/THY1/IL1RN/CCL5/KLF4/EPCAM/CCL28/CX3CL1/CAV1/GPNMB/VTCN1/VCAM1/CD4/ARG2/IDO1/SELP/DPP4/CEACAM1/ALOX5/SPINT2/AIF1/BMP7/AGER/CCL21	36
GO:0046394	carboxylic acid biosynthetic process	32/647	367/18866	1.42304e-06	3.6539e-05	2.40577e-05	GGT6/GATM/ALDH1A2/HAAO/ACADL/ACSM1/PTGDS/PKLR/BHMT/CSPG4/GSTP1/UPB1/ACSM5/AVPR1A/PROX1/GPT/PTGIS/HYAL1/LPL/IDO1/CYP4A11/SHMT2/EGF/CEACAM1/ALOX5/ALOX15B/TRIB3/CYP2E1/PYCR1/AGXT/CYP27A1/GGT1	32
GO:0045823	positive regulation of heart contraction	10/647	43/18866	1.44624e-06	3.69482e-05	2.43271e-05	TPM1/KCNQ1/EDN3/AVPR1A/RGS2/ADRB1/ATP1A1/CHGA/SLC1A1/ATP1A2	10
GO:0061756	leukocyte adhesion to vascular endothelial cell	11/647	53/18866	1.45563e-06	3.70021e-05	2.43626e-05	CXCL12/LEP/ITGB2/KLF4/CCL28/VCAM1/SELP/JAM2/ALOX5/SELPLG/CCL21	11
GO:0016053	organic acid biosynthetic process	32/647	368/18866	1.50909e-06	3.79832e-05	2.50086e-05	GGT6/GATM/ALDH1A2/HAAO/ACADL/ACSM1/PTGDS/PKLR/BHMT/CSPG4/GSTP1/UPB1/ACSM5/AVPR1A/PROX1/GPT/PTGIS/HYAL1/LPL/IDO1/CYP4A11/SHMT2/EGF/CEACAM1/ALOX5/ALOX15B/TRIB3/CYP2E1/PYCR1/AGXT/CYP27A1/GGT1	32
GO:0042311	vasodilation	9/647	34/18866	1.50917e-06	3.79832e-05	2.50086e-05	KCNMA1/APOE/EDNRB/RGS2/ADRB1/AGT/CASR/KNG1/BDKRB2	9
GO:0032496	response to lipopolysaccharide	30/647	334/18866	1.65061e-06	4.10613e-05	2.70352e-05	CCR5/CXCL1/HAMP/LY86/VIM/GSTP1/CCL5/ACP5/PTGFR/EDNRB/CX3CL1/MEF2C/CXCL2/PLSCR4/ALPL/TIMP4/SPARC/IDO1/SLPI/SELP/AKAP12/MGST1/CD36/CXCL10/REN/CLDN1/S100A14/LTF/GGT1/PPARGC1A	30
GO:0050926	regulation of positive chemotaxis	8/647	26/18866	1.6557e-06	4.10613e-05	2.70352e-05	CXCL12/VEGFA/F3/CASR/S1PR1/KDR/AGER/ANGPT2	8
GO:0072012	glomerulus vasculature development	8/647	26/18866	1.6557e-06	4.10613e-05	2.70352e-05	PDGFRA/TEK/WT1/TCF21/ACTA2/EGR1/BMP7/ANGPT2	8
GO:0001890	placenta development	19/647	156/18866	1.72789e-06	4.26437e-05	2.80771e-05	SPP1/LEP/MME/STC2/GRHL2/IGF2/KRT8/KRT19/ST14/GATA2/NR2F2/PTGIS/ETNK2/ASCL2/SPINT1/EGFR/SPINT2/HSD17B2/BMP7	19
GO:0001933	negative regulation of protein phosphorylation	36/647	444/18866	1.75986e-06	4.32227e-05	2.84584e-05	SFRP1/SFRP2/PPP1R1B/MECOM/APOE/FBLN1/SH3BP5/THY1/GSTP1/KLF4/CDKN1C/DUSP5/CBLC/SFN/EMILIN1/PER1/PLK1/UCHL1/CAV1/RGS2/NR2F2/AGT/XDH/RASIP1/BDKRB2/CEACAM1/PTPRO/TRIB3/SPRY2/IGFBP3/DUSP1/FABP4/BMP7/PRKAR2B/PTPRH/PPARGC1A	36
GO:0002687	positive regulation of leukocyte migration	18/647	142/18866	1.80325e-06	4.38648e-05	2.88811e-05	CXCL12/VEGFA/LGALS3/THY1/TNFRSF18/CCL5/EDN3/CX3CL1/CCL20/SELP/C3AR1/JAM2/CXCL10/AIF1/RAC2/AGER/S100A14/CCL21	18
GO:0072073	kidney epithelium development	18/647	142/18866	1.80325e-06	4.38648e-05	2.88811e-05	SFRP1/SDC4/VEGFA/GATA3/WT1/WNK4/EPCAM/FGF2/PAX8/TCF21/MEF2C/AGT/ARG2/PTPRO/FGF1/TFAP2B/CALB1/BMP7	18
GO:0006816	calcium ion transport	35/647	426/18866	1.81647e-06	4.3976e-05	2.89543e-05	MYLK/CXCL12/CCR5/RRAD/STC2/LGALS3/CORO1A/CXCR4/THY1/CCL5/NOL3/FGF2/CX3CL1/CAV1/RAMP2/BIN1/AHNAK/CD4/AGT/CACNA1H/CASR/EHD3/HSPA2/JPH2/ATP1B1/ANXA9/EGF/CXCL10/ANXA6/CASQ2/CALCRL/GEM/ATP1A2/APLNR/CCL21	35
GO:0097305	response to alcohol	24/647	234/18866	1.83864e-06	4.43015e-05	2.91687e-05	SFRP1/TGFBR3/CCR5/LEP/GATA3/INHBA/NEFL/HAMP/GSTP1/KLF4/ACTC1/PTGFR/KLF2/AVPR1A/RGS2/SPARC/IGFBP7/GSN/CYP2E1/ADCY5/CDK1/CLDN3/CLDN1/CCL21	24
GO:0003159	morphogenesis of an endothelium	7/647	19/18866	1.89905e-06	4.53274e-05	2.98442e-05	CXCR4/DLL4/ITGAX/ACVRL1/CXCL10/FGF1/RHOB	7
GO:0061154	endothelial tube morphogenesis	7/647	19/18866	1.89905e-06	4.53274e-05	2.98442e-05	CXCR4/DLL4/ITGAX/ACVRL1/CXCL10/FGF1/RHOB	7
GO:0042326	negative regulation of phosphorylation	38/647	484/18866	1.97706e-06	4.66748e-05	3.07313e-05	SFRP1/SFRP2/PPP1R1B/MECOM/APOE/FBP1/INHBA/FBLN1/SH3BP5/THY1/GSTP1/KLF4/CDKN1C/DUSP5/CBLC/SFN/EMILIN1/PER1/PLK1/UCHL1/CAV1/RGS2/NR2F2/AGT/XDH/RASIP1/BDKRB2/CEACAM1/PTPRO/TRIB3/SPRY2/IGFBP3/DUSP1/FABP4/BMP7/PRKAR2B/PTPRH/PPARGC1A	38
GO:0000302	response to reactive oxygen species	24/647	235/18866	1.98304e-06	4.66748e-05	3.07313e-05	CRYAB/TPM1/AQP1/COL1A1/PDGFRA/APOE/CYP1B1/GSTP1/KLF4/SOD3/KLF2/APOD/HYAL1/FBLN5/EGFR/CD36/RHOB/DUSP1/CYP2E1/PYCR1/BMP7/CDK1/MET/PPARGC1A	24
GO:0071695	anatomical structure maturation	24/647	235/18866	1.98304e-06	4.66748e-05	3.07313e-05	CDH5/NR4A2/VEGFA/LEP/ALDH1A2/HOXA5/GATA3/MYOC/FGG/GATA2/KLF2/EDNRB/CX3CL1/ACVRL1/FERMT1/NTN4/S1PR1/KCNIP2/C1QA/C3/NFASC/REN/LTF/CCL21	24
GO:0060840	artery development	15/647	102/18866	1.99796e-06	4.68094e-05	3.08199e-05	MYLK/VEGFA/LEP/APOE/HAND2/MYH10/GJA5/DLL4/FOLR1/COMP/PROX1/LDLR/ACVRL1/NGFR/TFAP2B	15
GO:0007519	skeletal muscle tissue development	19/647	158/18866	2.09625e-06	4.88869e-05	3.21877e-05	S100B/SVIL/MEOX2/HLF/HOXD10/ASB2/ANKRD2/MSC/KLF5/TCF21/CAV1/MEF2C/NR2F2/MYOZ1/PITX1/CFL2/CAV2/EGR1/MYOM1	19
GO:0030199	collagen fibril organization	11/647	55/18866	2.14702e-06	4.96157e-05	3.26676e-05	DDR2/COL1A1/SFRP2/CYP1B1/COL14A1/EMILIN1/TNXB/COMP/DPT/COL5A1/COL1A2	11
GO:0050819	negative regulation of coagulation	11/647	55/18866	2.14702e-06	4.96157e-05	3.26676e-05	F11/PLAT/PDGFRA/APOE/FGG/HRG/SERPING1/APOH/KNG1/CEACAM1/PLAU	11
GO:0001823	mesonephros development	15/647	103/18866	2.26566e-06	5.18857e-05	3.41622e-05	SFRP1/SDC4/VEGFA/GATA3/WT1/EPCAM/FGF2/PAX8/TCF21/AGT/ARG2/FGF1/CALB1/BMP7/REN	15
GO:0030593	neutrophil chemotaxis	15/647	103/18866	2.26566e-06	5.18857e-05	3.41622e-05	LGALS3/ITGB2/VAV3/CXCL1/JAM3/CCL5/EDN3/CX3CL1/CXCL2/CCL20/C3AR1/DPP4/CXCL10/RAC2/CCL21	15
GO:0003205	cardiac chamber development	20/647	174/18866	2.31506e-06	5.27791e-05	3.47504e-05	TPM1/TGFBR3/SFRP2/ADAMTS1/GATA3/TEK/GRHL2/HAND2/CPE/FHL2/MYH10/GJA5/DLL4/PAX8/MEF2C/PROX1/ZFPM2/TNNC1/GATA6/BMP7	20
GO:0042445	hormone metabolic process	23/647	221/18866	2.34137e-06	5.31407e-05	3.49885e-05	SPP1/CTSK/PDGFRA/LEP/ALDH1A2/MME/STC2/GATA3/CPE/CYP1B1/ADH1C/PAX8/ADH1B/DUOX1/CRABP1/CACNA1H/ENPEP/ATP1A1/EGR1/LIPE/HSD17B2/REN/PPARGC1A	23
GO:0035637	multicellular organismal signaling	22/647	206/18866	2.52507e-06	5.70554e-05	3.7566e-05	ABCC9/KCNQ1/GJA5/JAM3/FXYD1/CAV1/AVPR1A/BIN1/AGT/CACNA1H/EHD3/ATP1A1/S1PR1/KCNIP2/NFASC/ATP1B1/NPR1/KCNE4/CASQ2/KCNK3/FXYD6/ATP1A2	22
GO:0033280	response to vitamin D	9/647	36/18866	2.54749e-06	5.70973e-05	3.75935e-05	SFRP1/SPP1/STC2/AQP3/CD4/ALPL/CASR/CXCL10/BMP7	9
GO:0030239	myofibril assembly	12/647	67/18866	2.54939e-06	5.70973e-05	3.75935e-05	TPM1/PDGFRA/KRT8/MYH10/KRT19/ACTC1/MEF2C/PROX1/MYOZ1/CFL2/CSRP1/CASQ2	12
GO:0043407	negative regulation of MAP kinase activity	13/647	79/18866	2.64912e-06	5.90706e-05	3.88928e-05	SFRP1/SFRP2/APOE/GSTP1/DUSP5/CBLC/UCHL1/CAV1/RGS2/AGT/SPRY2/DUSP1/BMP7	13
GO:0061437	renal system vasculature development	8/647	28/18866	3.0998e-06	6.85191e-05	4.51138e-05	PDGFRA/TEK/WT1/TCF21/ACTA2/EGR1/BMP7/ANGPT2	8
GO:0061440	kidney vasculature development	8/647	28/18866	3.0998e-06	6.85191e-05	4.51138e-05	PDGFRA/TEK/WT1/TCF21/ACTA2/EGR1/BMP7/ANGPT2	8
GO:0003091	renal water homeostasis	9/647	37/18866	3.26462e-06	7.15403e-05	4.7103e-05	AQP1/AQP4/AQP3/ATP6V1B1/CYP4A11/CYP4F2/TFAP2B/ADCY5/PRKAR2B	9
GO:0090322	regulation of superoxide metabolic process	9/647	37/18866	3.26462e-06	7.15403e-05	4.7103e-05	ITGB2/GSTP1/ACP5/AGT/FBLN5/EGFR/CD177/CD36/BMP7	9
GO:0046718	viral entry into host cell	17/647	134/18866	3.43514e-06	7.49538e-05	4.93505e-05	CCR5/CXCR4/ITGA5/NCAM1/CAV1/LDLR/HYAL1/CD4/HAVCR1/ITGB6/DPP4/EGFR/CAV2/GSN/SELPLG/CDK1/CLDN1	17
GO:0045216	cell-cell junction organization	22/647	210/18866	3.46987e-06	7.5388e-05	4.96364e-05	CDH5/LIMS2/VEGFA/GRHL2/GJA5/JAM3/CLDN4/CLDN8/CLDN5/CAV1/RAMP2/AGT/CDH6/CD177/UGT8/NFASC/FSCN1/PTPRO/CLDN3/CRB3/CLDN1/CLDN16	22
GO:1903037	regulation of leukocyte cell-cell adhesion	29/647	329/18866	3.56633e-06	7.71542e-05	5.07993e-05	SDC4/CXCL12/HLA-DPA1/DTX1/HLA-DPB1/LEP/LGALS3/GATA3/ITGB2/IGF2/CORO1A/THY1/CCL5/KLF4/CCL28/CAV1/GPNMB/VTCN1/VCAM1/CD4/ARG2/IDO1/SELP/DPP4/CEACAM1/ALOX5/AIF1/AGER/CCL21	29
GO:0050679	positive regulation of epithelial cell proliferation	22/647	211/18866	3.7516e-06	8.08183e-05	5.32118e-05	SFRP1/CXCL12/VEGFA/F3/TEK/IGF2/CCL5/ECM1/GATA2/FGF2/FGF7/PROX1/HYAL1/ACVRL1/MMP12/FGF9/KDR/EGFR/CAV2/FGF1/CLDN1/APLNR	22
GO:0043491	protein kinase B signaling	26/647	278/18866	3.8898e-06	8.3442e-05	5.49393e-05	PDGFRA/LEP/GATA3/F3/TEK/MYOC/IGF2/F10/CCL5/KLF4/FGF2/FGF7/CX3CL1/KIT/FGF9/XDH/KDR/EGFR/EGF/FGF1/FGF18/TRIB3/SPRY2/RAC2/MET/CCL21	26
GO:1904062	regulation of cation transmembrane transport	30/647	349/18866	4.03519e-06	8.61972e-05	5.67533e-05	DPP6/RRAD/KCNQ1/NEFL/HAMP/CORO1A/THY1/WNK4/FXYD1/EDN3/CX3CL1/CAV1/MEF2C/RGS2/BIN1/AHNAK/AGT/EHD3/KCNIP2/HSPA2/JPH2/ATP1B1/KCNE4/CXCL10/CASQ2/FXYD6/GEM/ATP1A2/APLNR/PPARGC1A	30
GO:0051348	negative regulation of transferase activity	27/647	296/18866	4.07614e-06	8.67076e-05	5.70893e-05	SFRP1/SFRP2/PPP1R1B/APOE/SH3BP5/THY1/GSTP1/CDKN1C/DUSP5/CBLC/SFN/PLK1/UCHL1/CAV1/RGS2/NR2F2/AGT/RASIP1/CEACAM1/PTPRO/TRIB3/SPRY2/DUSP1/FABP4/BMP7/PRKAR2B/PTPRH	27
GO:0050901	leukocyte tethering or rolling	8/647	29/18866	4.15268e-06	8.76025e-05	5.76786e-05	CXCL12/LEP/CCL28/VCAM1/SELP/JAM2/SELPLG/CCL21	8
GO:0150117	positive regulation of cell-substrate junction organization	8/647	29/18866	4.15268e-06	8.76025e-05	5.76786e-05	SFRP1/SDC4/VEGFA/TEK/MYOC/HRG/THY1/KDR	8
GO:0033628	regulation of cell adhesion mediated by integrin	10/647	48/18866	4.22674e-06	8.87965e-05	5.84647e-05	SFRP2/HRG/CYP1B1/JAM3/MUC1/CCL5/FERMT1/DPP4/PLAU/CCL21	10
GO:0006690	icosanoid metabolic process	16/647	122/18866	4.28763e-06	8.93374e-05	5.88209e-05	GGT6/PTGDS/CYP1B1/GSTP1/AVPR1A/PTGIS/ATP6V1B1/CES2/CYP2B6/CYP4A11/CYP2J2/CYP4F2/ALOX5/ALOX15B/CYP2E1/GGT1	16
GO:1990266	neutrophil migration	16/647	122/18866	4.28763e-06	8.93374e-05	5.88209e-05	LGALS3/ITGB2/VAV3/CXCL1/JAM3/CCL5/EDN3/CX3CL1/CXCL2/CCL20/C3AR1/DPP4/CD177/CXCL10/RAC2/CCL21	16
GO:0050730	regulation of peptidyl-tyrosine phosphorylation	25/647	263/18866	4.46347e-06	9.26216e-05	6.09832e-05	SFRP1/VEGFA/SFRP2/LEP/ITGB2/IGF2/HRG/SH3BP5/CSPG4/ITGA5/THY1/TNFRSF18/CCL5/CBLC/FGF7/CAV1/KIT/CD4/TDGF1/AGT/EGFR/CNTN1/CD36/EGF/AFAP1L2	25
GO:0043588	skin development	34/647	425/18866	4.56635e-06	9.43712e-05	6.21352e-05	KRT20/CTSK/KRT5/COL1A1/INHBA/GRHL2/KRT8/KRT7/KRT19/AQP3/CLDN4/ST14/SFN/KRT6A/COMP/FGF7/PALLD/FST/KRT18/SOSTDC1/KRT14/NGFR/FERMT1/EGFR/COL5A1/COL1A2/TFAP2B/ALOX15B/KRT15/DHCR24/KRT17/MET/CLDN1/SPRR3	34
GO:0048041	focal adhesion assembly	13/647	83/18866	4.68227e-06	9.6375e-05	6.34545e-05	SFRP1/SDC4/VEGFA/TEK/MYOC/FAM107A/HRG/SORBS1/THY1/FERMT2/APOD/ACVRL1/KDR	13
GO:0061383	trabecula morphogenesis	10/647	49/18866	5.14892e-06	0.000105553	6.94973e-05	SFRP1/TGFBR3/COL1A1/ADAMTS1/TEK/FHL2/DLL4/FBN2/S1PR1/BMP7	10
GO:0019229	regulation of vasoconstriction	11/647	60/18866	5.26325e-06	0.000107463	7.07551e-05	LEP/FGG/GJA5/EDN3/CAV1/AVPR1A/AGT/CASR/EGFR/BDKRB2/ATP1A2	11
GO:0043434	response to peptide hormone	35/647	447/18866	5.32618e-06	0.000108313	7.13148e-05	NR4A2/CXCL12/TGFBR3/COL1A1/LEP/STC2/TEK/HSD11B2/NEFL/IGF2/PKLR/SORBS1/ATP6V0A4/GSTP1/EDNRB/CAV1/SOCS2/GPT/G6PC/SLC34A1/ATP6V1B1/LPL/TIMP4/AGT/SPARC/CAV2/EGR1/CEACAM1/SLC2A1/TRIB3/MAP1B/ADCY5/BMP7/PRKAR2B/INHBB	35
GO:0050886	endocrine process	13/647	84/18866	5.36831e-06	0.000108735	7.15925e-05	LEP/MME/GATA3/INHBA/HSD11B2/GJA5/TACR2/EDN3/AVPR1A/AGT/ENPEP/REN/INHBB	13
GO:0071711	basement membrane organization	8/647	30/18866	5.49347e-06	0.000110829	7.29709e-05	LAMB3/COL4A1/CAV1/RAMP2/FERMT1/NTN4/CAV2/SPINT2	8
GO:1901654	response to ketone	21/647	200/18866	5.55848e-06	0.000111668	7.35238e-05	SFRP1/SPP1/TGFBR3/AQP1/SERPINF1/NEFL/CLDN4/KLF4/PTGFR/KLF2/CAV1/RAMP2/AVPR1A/NR3C1/IGFBP7/EGFR/DUSP1/ADCY5/CA9/CLDN1/CCL21	21
GO:1902903	regulation of supramolecular fiber organization	31/647	373/18866	5.57902e-06	0.000111668	7.35238e-05	SFRP1/CDH5/SVIL/SDC4/CXCL12/CRYAB/TPM1/CYFIP2/APOE/MYOC/SPTBN2/CORO1A/EMILIN1/CX3CL1/MEF2C/PROX1/LDLR/BIN1/SYNPO/CFL2/STMN2/CLU/TPX2/S1PR1/PLEK/ARHGEF15/GSN/MAP1B/SCIN/MET/CCL21	31
GO:0052126	movement in host environment	19/647	169/18866	5.72081e-06	0.000114057	7.50967e-05	CCR5/CXCR4/ITGA5/NCAM1/KRT6A/CAV1/LDLR/HYAL1/CD4/HAVCR1/ITGB6/DPP4/EGFR/CAV2/GSN/SELPLG/CDK1/MET/CLDN1	19
GO:0060487	lung epithelial cell differentiation	7/647	22/18866	5.87498e-06	0.000116674	7.68193e-05	HOXA5/GRHL2/AGR2/KLF2/SPDEF/NFIB/GATA6	7
GO:0043500	muscle adaptation	16/647	125/18866	5.90075e-06	0.000116729	7.6856e-05	PDE9A/GATM/MYOC/HAND2/HAMP/KLF4/MEF2C/RGS2/MYOZ1/AGT/TNNC1/GSN/GATA6/AIF1/SGCA/PPARGC1A	16
GO:0002237	response to molecule of bacterial origin	30/647	356/18866	5.99684e-06	0.00011817	7.78047e-05	CCR5/CXCL1/HAMP/LY86/VIM/GSTP1/CCL5/ACP5/PTGFR/EDNRB/CX3CL1/MEF2C/CXCL2/PLSCR4/ALPL/TIMP4/SPARC/IDO1/SLPI/SELP/AKAP12/MGST1/CD36/CXCL10/REN/CLDN1/S100A14/LTF/GGT1/PPARGC1A	30
GO:0001657	ureteric bud development	14/647	98/18866	6.18287e-06	0.000121366	7.99086e-05	SFRP1/SDC4/VEGFA/GATA3/WT1/EPCAM/FGF2/PAX8/TCF21/AGT/ARG2/FGF1/CALB1/BMP7	14
GO:0003044	regulation of systemic arterial blood pressure mediated by a chemical signal	10/647	50/18866	6.24034e-06	0.000122023	8.03412e-05	TPM1/MME/HSD11B2/GJA5/EDN3/AVPR1A/ADRB1/AGT/ENPEP/REN	10
GO:0060048	cardiac muscle contraction	17/647	140/18866	6.26718e-06	0.000122078	8.03776e-05	TPM1/KCNQ1/GJA5/CXCR4/ACTC1/CAV1/RGS2/BIN1/EHD3/TNNC1/ATP1A1/MAP2K6/ATP1B1/KCNE4/CHGA/CASQ2/ATP1A2	17
GO:0034765	regulation of ion transmembrane transport	37/647	489/18866	6.30115e-06	0.000122271	8.05048e-05	DPP6/ABCB1/KCNMA1/RRAD/KCNQ1/NEFL/HAMP/GJA5/CORO1A/THY1/WNK4/FXYD1/EDN3/KCNJ1/CX3CL1/CAV1/MEF2C/RGS2/BIN1/SLC34A1/AHNAK/AGT/CACNA1H/EHD3/KCNIP2/HSPA2/JPH2/ATP1B1/KCNE4/CXCL10/CLIC3/CASQ2/FXYD6/GEM/ATP1A2/APLNR/PPARGC1A	37
GO:0003208	cardiac ventricle morphogenesis	12/647	73/18866	6.47866e-06	0.000124659	8.20768e-05	TPM1/TGFBR3/SFRP2/GATA3/GRHL2/HAND2/CPE/DLL4/MEF2C/PROX1/ZFPM2/TNNC1	12
GO:1903779	regulation of cardiac conduction	12/647	73/18866	6.47866e-06	0.000124659	8.20768e-05	ABCC9/GJA5/FXYD1/CAV1/AGT/EHD3/ATP1A1/ATP1B1/NPR1/CASQ2/FXYD6/ATP1A2	12
GO:0007179	transforming growth factor beta receptor signaling pathway	21/647	202/18866	6.49775e-06	0.000124659	8.20768e-05	CDH5/ITGA8/TGFBR3/RASL11B/FERMT2/TGFB1I1/CDKN1C/EMILIN1/FOLR1/FBN2/CLDN5/CAV1/CIDEA/ACVRL1/FERMT1/LTBP4/CAV2/VEPH1/COL1A2/SPRY2/CGN	21
GO:1902895	positive regulation of pri-miRNA transcription by RNA polymerase II	9/647	40/18866	6.54512e-06	0.000125095	8.23643e-05	GATA3/WT1/KLF4/GATA2/FGF2/KLF5/NGFR/NR3C1/EGR1	9
GO:0045444	fat cell differentiation	23/647	235/18866	6.60246e-06	0.000125719	8.27748e-05	SFRP1/NR4A2/SFRP2/LEP/GATA3/LAMB3/KLF4/TGFB1I1/GATA2/KLF5/RGS2/ADRB1/LPL/ZFPM2/ID4/ALOX5/TFAP2B/TRIB3/PLAC8/FABP4/BMP7/INHBB/PPARGC1A	23
GO:0070838	divalent metal ion transport	36/647	471/18866	6.71772e-06	0.000127436	8.39056e-05	MYLK/CXCL12/CCR5/RRAD/STC2/LGALS3/CORO1A/CXCR4/THY1/CCL5/NOL3/FGF2/CX3CL1/CAV1/RAMP2/BIN1/AHNAK/CD4/AGT/CACNA1H/CASR/EHD3/HSPA2/JPH2/ATP1B1/ANXA9/EGF/CXCL10/ANXA6/CASQ2/CALCRL/GEM/ATP1A2/CLDN16/APLNR/CCL21	36
GO:0072163	mesonephric epithelium development	14/647	99/18866	6.97783e-06	0.00013139	8.65088e-05	SFRP1/SDC4/VEGFA/GATA3/WT1/EPCAM/FGF2/PAX8/TCF21/AGT/ARG2/FGF1/CALB1/BMP7	14
GO:0072164	mesonephric tubule development	14/647	99/18866	6.97783e-06	0.00013139	8.65088e-05	SFRP1/SDC4/VEGFA/GATA3/WT1/EPCAM/FGF2/PAX8/TCF21/AGT/ARG2/FGF1/CALB1/BMP7	14
GO:0051896	regulation of protein kinase B signaling	24/647	253/18866	7.15171e-06	0.000133767	8.80739e-05	PDGFRA/LEP/GATA3/F3/TEK/MYOC/IGF2/F10/KLF4/FGF2/FGF7/CX3CL1/KIT/FGF9/XDH/EGFR/EGF/FGF1/FGF18/TRIB3/SPRY2/RAC2/MET/CCL21	24
GO:0007015	actin filament organization	34/647	434/18866	7.16868e-06	0.000133767	8.80739e-05	SFRP1/SVIL/SDC4/CXCL12/TPM1/CYFIP2/MYOC/FAM107A/LCP1/SORBS2/SPTBN2/CORO1A/SORBS1/USH1C/ACTC1/CX3CL1/PROX1/BIN1/ELMO1/SYNPO/TF/CFL2/S1PR1/PLEK/ARHGEF15/TPM2/GSN/FSCN1/RHOB/SCIN/AIF1/RAC2/MET/CCL21	34
GO:0098868	bone growth	8/647	31/18866	7.18301e-06	0.000133767	8.80739e-05	DDR2/LEP/COMP/ECM1/FBLN5/BNC2/ANXA6/MMP13	8
GO:0071621	granulocyte chemotaxis	16/647	127/18866	7.25825e-06	0.000134675	8.86717e-05	LGALS3/ITGB2/VAV3/CXCL1/JAM3/CCL5/EDN3/CX3CL1/CXCL2/CCL20/C3AR1/DPP4/CXCL10/RAC2/S100A14/CCL21	16
GO:0032956	regulation of actin cytoskeleton organization	30/647	360/18866	7.47774e-06	0.000138054	9.08964e-05	SFRP1/SVIL/SDC4/CXCL12/TPM1/PDGFRA/CYFIP2/TEK/MYOC/FAM107A/SPTBN2/HRG/JAM3/CORO1A/CX3CL1/MEF2C/PROX1/BIN1/SYNPO/CFL2/S1PR1/PLEK/ARHGEF15/GSN/FSCN1/RHOB/SCIN/RAC2/MET/CCL21	30
GO:1903036	positive regulation of response to wounding	12/647	74/18866	7.49467e-06	0.000138054	9.08964e-05	MYLK/F3/HRG/CXCR4/CLDN4/APOH/DUOX1/SELP/PLEK/CD36/CLDN3/CLDN1	12
GO:1902893	regulation of pri-miRNA transcription by RNA polymerase II	10/647	51/18866	7.52628e-06	0.000138097	9.09249e-05	GATA3/WT1/KLF4/GATA2/FGF2/KLF5/NGFR/NR3C1/EGR1/NFIB	10
GO:0070372	regulation of ERK1 and ERK2 cascade	27/647	306/18866	7.55134e-06	0.000138097	9.09249e-05	PDGFRA/APOE/TEK/HAND2/FGG/FBLN1/GSTP1/CCL5/KLF4/FN1/EMILIN1/FGF2/CX3CL1/GPNMB/CD4/CASR/CCL20/AKAP12/KDR/EGFR/CD36/CEACAM1/FGF18/SPRY2/DUSP1/AGER/CCL21	27
GO:0016338	calcium-independent cell-cell adhesion via plasma membrane cell-adhesion molecules	7/647	23/18866	8.19624e-06	0.00014882	9.79851e-05	CLDN4/CLDN8/CX3CL1/CLDN5/CLDN3/CLDN1/CLDN16	7
GO:0060479	lung cell differentiation	7/647	23/18866	8.19624e-06	0.00014882	9.79851e-05	HOXA5/GRHL2/AGR2/KLF2/SPDEF/NFIB/GATA6	7
GO:0051893	regulation of focal adhesion assembly	11/647	63/18866	8.61524e-06	0.000154807	0.000101927	SFRP1/SDC4/VEGFA/TEK/MYOC/FAM107A/HRG/THY1/APOD/ACVRL1/KDR	11
GO:0090109	regulation of cell-substrate junction assembly	11/647	63/18866	8.61524e-06	0.000154807	0.000101927	SFRP1/SDC4/VEGFA/TEK/MYOC/FAM107A/HRG/THY1/APOD/ACVRL1/KDR	11
GO:0031100	animal organ regeneration	12/647	75/18866	8.64774e-06	0.000154807	0.000101927	CXCL12/TGFBR3/LCP1/NR0B2/HAMP/GSTP1/ANXA3/EGFR/NNMT/CDK1/ANGPT2/CLDN1	12
GO:0048844	artery morphogenesis	12/647	75/18866	8.64774e-06	0.000154807	0.000101927	MYLK/VEGFA/APOE/HAND2/GJA5/DLL4/FOLR1/COMP/PROX1/LDLR/ACVRL1/TFAP2B	12
GO:0006575	cellular modified amino acid metabolic process	20/647	190/18866	8.90502e-06	0.000158853	0.000104591	GGT6/CTSK/GSTM3/GATM/GATA3/ACADL/DMGDH/BHMT/CKMT2/GSTP1/FOLR1/PAX8/DUOX1/FTCD/SHMT2/ALDH4A1/GSTM5/NAT8/GNMT/GGT1	20
GO:0060421	positive regulation of heart growth	10/647	52/18866	9.03491e-06	0.000160119	0.000105424	TGFBR3/WT1/HAMP/FGF2/MEF2C/PROX1/ZFPM2/FGF9/GATA6/CDK1	10
GO:0006979	response to oxidative stress	35/647	458/18866	9.04533e-06	0.000160119	0.000105424	NR4A2/CRYAB/TPM1/AQP1/COL1A1/PDGFRA/STC2/APOE/CYP1B1/GSTP1/ANKRD2/KLF4/NOL3/SOD3/KLF2/APOD/DUOX1/HYAL1/FBLN5/MGST1/EGFR/CD36/ALOX5/RHOB/DUSP1/DHCR24/CYP2E1/PYCR1/AIF1/BMP7/MGAT3/SLC1A1/CDK1/MET/PPARGC1A	35
GO:0060419	heart growth	15/647	115/18866	9.10027e-06	0.000160119	0.000105424	TGFBR3/WT1/SORBS2/HAMP/FGF2/MEF2C/PROX1/RGS2/AGT/ZFPM2/FGF9/S1PR1/GATA6/PDLIM5/CDK1	15
GO:0055067	monovalent inorganic cation homeostasis	18/647	159/18866	9.10195e-06	0.000160119	0.000105424	KCNMA1/SCNN1A/SCNN1B/ATP6V0A4/SLC9A3/EDNRB/AVPR1A/ATP6V1B1/AGT/C7/ATP1A1/CYP4A11/ATP1B1/CYP4F2/NPR1/SLC12A1/TFAP2B/ATP1A2	18
GO:0045927	positive regulation of growth	25/647	274/18866	9.16797e-06	0.000160508	0.00010568	SFRP1/CXCL12/VEGFA/TGFBR3/SFRP2/LEP/IGF2/WT1/AGR2/HAMP/CXCR4/FN1/SFN/FGF2/MEF2C/AVPR1A/PROX1/HYAL1/ZFPM2/FGF9/EGFR/GATA6/MAP1B/KRT17/CDK1	25
GO:0016485	protein processing	22/647	223/18866	9.1872e-06	0.000160508	0.00010568	F11/PLAT/SPON1/CYFIP2/MME/F3/FGG/CPE/KLK1/NOL3/CPXM2/COMP/APOH/ENPEP/CPM/CST7/GSN/GAS1/DHCR24/REN/PLAU/GGT1	22
GO:0072511	divalent inorganic cation transport	36/647	478/18866	9.30499e-06	0.000162009	0.000106669	MYLK/CXCL12/CCR5/RRAD/STC2/LGALS3/CORO1A/CXCR4/THY1/CCL5/NOL3/FGF2/CX3CL1/CAV1/RAMP2/BIN1/AHNAK/CD4/AGT/CACNA1H/CASR/EHD3/HSPA2/JPH2/ATP1B1/ANXA9/EGF/CXCL10/ANXA6/CASQ2/CALCRL/GEM/ATP1A2/CLDN16/APLNR/CCL21	36
GO:0032835	glomerulus development	11/647	64/18866	1.0085e-05	0.00017499	0.000115216	PDGFRA/TEK/WT1/TCF21/MEF2C/ACTA2/ENPEP/EGR1/PTPRO/BMP7/ANGPT2	11
GO:0061140	lung secretory cell differentiation	5/647	10/18866	1.02009e-05	0.0001764	0.000116144	HOXA5/AGR2/SPDEF/NFIB/GATA6	5
GO:0055006	cardiac cell development	13/647	89/18866	1.03092e-05	0.00017748	0.000116855	VEGFA/TGFBR3/PDGFRA/SORBS2/FHL2/MYH10/HAMP/ACTC1/PROX1/RGS2/AGT/PDLIM5/CDK1	13
GO:0010634	positive regulation of epithelial cell migration	19/647	176/18866	1.03332e-05	0.00017748	0.000116855	VEGFA/GATA3/TEK/GATA2/FGF2/FGF7/PROX1/HYAL1/RHOJ/TDGF1/AGT/SPARC/ANXA3/RAB25/KDR/FGF1/FGF18/RHOB/MET	19
GO:0061614	pri-miRNA transcription by RNA polymerase II	10/647	53/18866	1.07975e-05	0.000184831	0.000121695	GATA3/WT1/KLF4/GATA2/FGF2/KLF5/NGFR/NR3C1/EGR1/NFIB	10
GO:1901890	positive regulation of cell junction assembly	14/647	103/18866	1.11396e-05	0.000190045	0.000125128	SFRP1/SDC4/VEGFA/TEK/MYOC/HRG/THY1/THBS2/CLDN5/CAV1/AGT/KDR/CLDN3/CLDN1	14
GO:0045446	endothelial cell differentiation	15/647	117/18866	1.12547e-05	0.000191367	0.000125999	CDH5/GSTM3/VEGFA/CXCR4/CLDN5/PROX1/NR2F2/ACVRL1/XDH/S1PR1/KDR/CEACAM1/CLDN3/MET/CLDN1	15
GO:0044706	multi-multicellular organism process	22/647	226/18866	1.13639e-05	0.000192581	0.000126798	SPP1/VEGFA/LEP/STC2/HSD11B2/FBLN1/PTHLH/ITGA5/CLDN4/PTGFR/RAMP2/AVPR1A/RGS2/NR2F2/PTGIS/AGT/IDO1/PZP/IGFBP7/SLC2A1/ANGPT2/MMP7	22
GO:0070661	leukocyte proliferation	27/647	313/18866	1.14102e-05	0.000192722	0.00012689	NPR3/SDC4/HLA-DPA1/HLA-DPB1/LEP/LGALS3/VAV3/IGF2/CORO1A/GSTP1/CCL5/CX3CL1/GPNMB/MEF2C/VTCN1/VCAM1/KIT/CD4/ARG2/IDO1/CLU/AIF1/CD79A/RAC2/AGER/CD22/ENPP3	27
GO:0007588	excretion	11/647	65/18866	1.1768e-05	0.000198108	0.000130437	KCNMA1/SCNN1B/ATP6V0A4/TACR2/KCNJ1/EDNRB/AVPR1A/ATP6V1B1/AGT/NPR1/CLDN16	11
GO:0010595	positive regulation of endothelial cell migration	16/647	132/18866	1.1947e-05	0.000199798	0.000131549	VEGFA/GATA3/TEK/GATA2/FGF2/PROX1/RHOJ/TDGF1/AGT/SPARC/ANXA3/KDR/FGF1/FGF18/RHOB/MET	16
GO:0042476	odontogenesis	16/647	132/18866	1.1947e-05	0.000199798	0.000131549	AQP1/COL1A1/PDGFRA/INHBA/HAND2/AQP3/MSX1/FST/SOSTDC1/SLC34A1/ALPL/NGFR/TFAP2A/PAX9/COL1A2/BMP7	16
GO:0006941	striated muscle contraction	19/647	178/18866	1.21587e-05	0.000202671	0.000133441	TPM1/KCNQ1/GJA5/CXCR4/SYNM/ACTC1/CAV1/RGS2/BIN1/ARG2/EHD3/TNNC1/ATP1A1/MAP2K6/ATP1B1/KCNE4/CHGA/CASQ2/ATP1A2	19
GO:0034103	regulation of tissue remodeling	13/647	91/18866	1.32031e-05	0.000219165	0.000144301	SFRP1/SPP1/DDR2/LEP/HAND2/HRG/GPNMB/AGT/TF/S1PR1/EGFR/CEACAM1/AGER	13
GO:0061337	cardiac conduction	17/647	148/18866	1.32344e-05	0.000219165	0.000144301	ABCC9/KCNQ1/GJA5/FXYD1/CAV1/BIN1/AGT/EHD3/ATP1A1/KCNIP2/ATP1B1/NPR1/KCNE4/CASQ2/KCNK3/FXYD6/ATP1A2	17
GO:0150116	regulation of cell-substrate junction organization	11/647	66/18866	1.36898e-05	0.00022597	0.000148782	SFRP1/SDC4/VEGFA/TEK/MYOC/FAM107A/HRG/THY1/APOD/ACVRL1/KDR	11
GO:0048638	regulation of developmental growth	29/647	353/18866	1.38667e-05	0.000228149	0.000150216	SFRP1/SPP1/CXCL12/VEGFA/TGFBR3/SFRP2/LEP/STC2/APOE/IGF2/WT1/AGR2/HAMP/CXCR4/FN1/FGF2/MEF2C/SOCS2/PROX1/RGS2/ADRB1/MYOZ1/ZFPM2/FGF9/SEMA3B/GATA6/MAP1B/PLAC8/CDK1	29
GO:0007565	female pregnancy	20/647	196/18866	1.41497e-05	0.000232055	0.000152788	SPP1/VEGFA/LEP/STC2/HSD11B2/FBLN1/PTHLH/ITGA5/CLDN4/RAMP2/RGS2/NR2F2/PTGIS/AGT/IDO1/PZP/IGFBP7/SLC2A1/ANGPT2/MMP7	20
GO:0006809	nitric oxide biosynthetic process	12/647	79/18866	1.49611e-05	0.000242778	0.000159848	ITGB2/CYP1B1/KLF4/ACP5/KLF2/CAV1/PTGIS/AGT/ARG2/CLU/CD36/AIF1	12
GO:0085029	extracellular matrix assembly	9/647	44/18866	1.50129e-05	0.000242778	0.000159848	LAMB3/EMILIN1/TNXB/RAMP2/AGT/FBLN5/NTN4/COL1A2/MFAP4	9
GO:0035633	maintenance of blood-brain barrier	8/647	34/18866	1.5095e-05	0.000242778	0.000159848	CDH5/VEGFA/JAM3/CLDN5/JAM2/SLC1A1/CLDN3/CLDN1	8
GO:0003071	renal system process involved in regulation of systemic arterial blood pressure	7/647	25/18866	1.51378e-05	0.000242778	0.000159848	HSD11B2/GJA5/AGT/CYP4A11/CYP4F2/PTPRO/REN	7
GO:0050927	positive regulation of positive chemotaxis	7/647	25/18866	1.51378e-05	0.000242778	0.000159848	CXCL12/VEGFA/F3/CASR/S1PR1/KDR/AGER	7
GO:0071677	positive regulation of mononuclear cell migration	7/647	25/18866	1.51378e-05	0.000242778	0.000159848	CXCL12/LGALS3/CCL5/CXCL10/AIF1/AGER/S100A14	7
GO:2001026	regulation of endothelial cell chemotaxis	7/647	25/18866	1.51378e-05	0.000242778	0.000159848	VEGFA/HRG/FGF2/KDR/FGF1/FGF18/MET	7
GO:0060350	endochondral bone morphogenesis	10/647	55/18866	1.5227e-05	0.00024344	0.000160284	COL1A1/TEK/BMPR1B/COMP/CSGALNACT1/MEF2C/ALPL/ANXA6/FGF18/MMP13	10
GO:0060041	retina development in camera-type eye	17/647	150/18866	1.58119e-05	0.000251211	0.000165401	PDGFRA/SERPINF1/MYH10/CYP1B1/THY1/COL4A1/DLL4/TUB/USH1C/BMPR1B/PROX1/RHOJ/ACVRL1/TFAP2A/ARHGEF15/TFAP2B/CALB1	17
GO:0097530	granulocyte migration	17/647	150/18866	1.58119e-05	0.000251211	0.000165401	LGALS3/ITGB2/VAV3/CXCL1/JAM3/CCL5/EDN3/CX3CL1/CXCL2/CCL20/C3AR1/DPP4/CD177/CXCL10/RAC2/S100A14/CCL21	17
GO:0002548	monocyte chemotaxis	11/647	67/18866	1.58781e-05	0.000251477	0.000165576	CXCL12/LGALS3/CCL5/CX3CL1/CCL20/CXCL10/PTPRO/DUSP1/AIF1/S100A14/CCL21	11
GO:0007568	aging	27/647	319/18866	1.60645e-05	0.000253639	0.000166999	CRYAB/DDC/SERPINF1/LEP/MME/ITGB2/HMGA1/HAMP/SERPING1/TIMP2/COMP/EDNRB/CX3CL1/COL4A2/APOD/KRT14/AGT/ARG2/C1QA/AURKB/NEK6/GSN/AGER/CDK1/CLDN1/MMP7/PPARGC1A	27
GO:0090288	negative regulation of cellular response to growth factor stimulus	19/647	182/18866	1.67012e-05	0.000262876	0.000173081	SFRP1/TGFBR3/SFRP2/RASL11B/GATA3/HRG/TGFB1I1/EMILIN1/FGF2/FBN2/CAV1/CIDEA/SOSTDC1/AGT/NGFR/XDH/CAV2/VEPH1/SPRY2	19
GO:0014909	smooth muscle cell migration	13/647	93/18866	1.67877e-05	0.000263422	0.00017344	PLAT/TPM1/ADAMTS1/GSTP1/CCL5/MEF2C/AGT/FGF9/S100A11/IGFBP3/AIF1/PLAU/PPARGC1A	13
GO:0120254	olefinic compound metabolic process	15/647	121/18866	1.69629e-05	0.000265351	0.000174711	ALDH1A2/PTGDS/CYP1B1/GSTP1/PTGIS/CACNA1H/CYP2B6/CYP4A11/CYP2J2/EGR1/CYP4F2/ALOX5/ALOX15B/CYP2E1/PPARGC1A	15
GO:0098883	synapse pruning	5/647	11/18866	1.81734e-05	0.000282972	0.000186313	C1QC/CX3CL1/C1QB/C1QA/C3	5
GO:0045214	sarcomere organization	9/647	45/18866	1.82006e-05	0.000282972	0.000186313	TPM1/KRT8/KRT19/MEF2C/PROX1/MYOZ1/CFL2/CSRP1/CASQ2	9
GO:0051928	positive regulation of calcium ion transport	15/647	122/18866	1.87398e-05	0.000290466	0.000191247	MYLK/CXCL12/LGALS3/THY1/CCL5/CX3CL1/CAV1/CD4/CASR/EHD3/HSPA2/JPH2/ATP1B1/CXCL10/APLNR	15
GO:0051591	response to cAMP	13/647	94/18866	1.88808e-05	0.000291763	0.0001921	AQP1/COL1A1/KCNQ1/TEK/WT1/PKLR/PER1/DUOX1/SPARC/DUSP1/REN/GPD1/AGXT	13
GO:0031032	actomyosin structure organization	20/647	200/18866	1.90457e-05	0.00029342	0.000193191	SFRP1/SDC4/TPM1/PDGFRA/CNN1/MYOC/KRT8/MYH10/SORBS1/KRT19/ACTC1/MEF2C/PROX1/MYOZ1/CFL2/S1PR1/CSRP1/ARHGEF15/CASQ2/MET	20
GO:0002062	chondrocyte differentiation	14/647	108/18866	1.93272e-05	0.000296856	0.000195454	SFRP2/PTHLH/EFEMP1/BMPR1B/COMP/ECM1/MEF2C/ACVRL1/TGFBI/FGF9/NFIB/ANXA6/FGF18/SCIN	14
GO:0001937	negative regulation of endothelial cell proliferation	12/647	81/18866	1.9412e-05	0.000297261	0.00019572	APOE/DLL4/APOH/CAV1/MEF2C/NR2F2/ACVRL1/NGFR/SPARC/XDH/CAV2/ALOX5	12
GO:0031348	negative regulation of defense response	24/647	269/18866	1.99827e-05	0.000303304	0.000199699	CDH5/A2M/HLA-F/SERPINF1/APOE/GATA3/TNFAIP6/TEK/SERPING1/GSTP1/KLF4/ACP5/CX3CL1/LDLR/APOD/PTGIS/ARG2/MMP12/CST7/CEACAM1/ALOX5/CALCRL/AGER/ENPP3	24
GO:0062197	cellular response to chemical stress	29/647	360/18866	2.00304e-05	0.000303304	0.000199699	NR4A2/MYLK/TPM1/AQP1/PDGFRA/CYP1B1/GSTP1/ANKRD2/KLF4/NOL3/SOD3/KLF2/CAV1/FBLN5/MGST1/EGFR/BDKRB2/CD36/SLC2A1/ALOX5/RHOB/PYCR1/AIF1/BMP7/MGAT3/SLC1A1/CDK1/MET/PPARGC1A	29
GO:0009914	hormone transport	27/647	323/18866	2.00635e-05	0.000303304	0.000199699	SFRP1/SPP1/PTPRN2/LEP/GATA3/SLC7A8/INHBA/FGG/CPE/NR0B2/IL1RN/TACR2/CCL5/EDN3/PAX8/AGT/CASR/DPP4/LTBP4/EGFR/SLC2A1/CHGA/ALOX5/TFAP2B/ADCY5/REN/INHBB	27
GO:0042730	fibrinolysis	7/647	26/18866	2.01049e-05	0.000303304	0.000199699	F11/PLAT/FGG/HRG/SERPING1/APOH/PLAU	7
GO:0060343	trabecula formation	7/647	26/18866	2.01049e-05	0.000303304	0.000199699	SFRP1/TGFBR3/COL1A1/ADAMTS1/TEK/FHL2/FBN2	7
GO:0071774	response to fibroblast growth factor	17/647	153/18866	2.05197e-05	0.000308645	0.000203216	SFRP1/COL1A1/GALNT3/GATA3/HHIP/DLL4/CCL5/FGF2/FGF7/HYAL1/TDGF1/NGFR/CASR/FGF9/FGF1/FGF18/SPRY2	17
GO:0007597	blood coagulation, intrinsic pathway	6/647	18/18866	2.07347e-05	0.000309135	0.000203538	F11/A2M/SERPING1/APOH/KNG1/VWF	6
GO:0061298	retina vasculature development in camera-type eye	6/647	18/18866	2.07347e-05	0.000309135	0.000203538	PDGFRA/CYP1B1/COL4A1/RHOJ/ACVRL1/ARHGEF15	6
GO:1990000	amyloid fibril formation	6/647	18/18866	2.07347e-05	0.000309135	0.000203538	CRYAB/APOE/LDLR/CLU/GSN/CD36	6
GO:0042698	ovulation cycle	11/647	69/18866	2.11783e-05	0.000313303	0.000206282	PDGFRA/SERPINF1/LEP/ADAMTS1/INHBA/BMPR1B/TIMP4/EGFR/MAP2K6/EGR1/MMP7	11
GO:0048662	negative regulation of smooth muscle cell proliferation	11/647	69/18866	2.11783e-05	0.000313303	0.000206282	NPR3/TPM1/CNN1/GSTP1/KLF4/MEF2C/APOD/NPR1/IGFBP3/AIF1/PPARGC1A	11
GO:0061326	renal tubule development	13/647	95/18866	2.11991e-05	0.000313303	0.000206282	VEGFA/GATA3/WT1/COL4A1/WNK4/FGF2/PAX8/TCF21/MEF2C/AGT/FGF1/TFAP2B/CALB1	13
GO:0072593	reactive oxygen species metabolic process	25/647	288/18866	2.15118e-05	0.000317003	0.000208719	CRYAB/LEP/ITGB2/CYP1B1/GSTP1/KLF4/ACP5/SOD3/KLF2/CAV1/DUOX1/PTGIS/AGT/FBLN5/ARG2/CLU/TFAP2A/XDH/EGFR/CD177/CD36/ALOX5/AIF1/BMP7/RAC2	25
GO:0019369	arachidonic acid metabolic process	10/647	58/18866	2.47647e-05	0.000363884	0.000239586	PTGDS/CYP1B1/PTGIS/CYP2B6/CYP4A11/CYP2J2/CYP4F2/ALOX5/ALOX15B/CYP2E1	10
GO:0055013	cardiac muscle cell development	12/647	83/18866	2.49751e-05	0.000365918	0.000240925	VEGFA/PDGFRA/SORBS2/FHL2/MYH10/HAMP/ACTC1/PROX1/RGS2/AGT/PDLIM5/CDK1	12
GO:0042551	neuron maturation	9/647	47/18866	2.63266e-05	0.00038461	0.000253232	NR4A2/MYOC/EDNRB/CX3CL1/NTN4/KCNIP2/C1QA/C3/NFASC	9
GO:1902904	negative regulation of supramolecular fiber organization	17/647	156/18866	2.64362e-05	0.000385105	0.000253558	CDH5/SVIL/CRYAB/APOE/MYOC/SPTBN2/CORO1A/EMILIN1/LDLR/STMN2/CLU/TPX2/S1PR1/GSN/MAP1B/SCIN/MET	17
GO:0071674	mononuclear cell migration	13/647	97/18866	2.65941e-05	0.000386299	0.000254344	CXCL12/LGALS3/CCL5/CX3CL1/CCL20/C3AR1/CXCL10/PTPRO/DUSP1/AIF1/AGER/S100A14/CCL21	13
GO:0019722	calcium-mediated signaling	21/647	222/18866	2.7519e-05	0.000397899	0.000261982	CCR5/FHL2/CXCR4/PTGFR/EDNRB/VCAM1/AVPR1A/MYOZ1/CD4/CCL20/SELP/KDR/PLEK/CALML3/EGFR/JPH2/ATP1B1/CASQ2/RCAN1/ATP1A2/CD22	21
GO:0055007	cardiac muscle cell differentiation	15/647	126/18866	2.76046e-05	0.000397899	0.000261982	VEGFA/PDGFRA/WT1/SORBS2/FHL2/MYH10/HAMP/ACTC1/MEF2C/PROX1/RGS2/AGT/GATA6/PDLIM5/CDK1	15
GO:0002683	negative regulation of immune system process	34/647	463/18866	2.76276e-05	0.000397899	0.000261982	SFRP1/A2M/C1QC/SDC4/CXCL12/HLA-F/DTX1/HOXA5/LGALS3/INHBA/THY1/SERPING1/HOXB8/EMILIN1/GATA2/CCL28/CX3CL1/GPNMB/VTCN1/LDLR/APOD/FGR/ARG2/IDO1/MMP12/DPP4/CST7/CEACAM1/DUSP1/C4BPA/CD22/ENPP3/LTF/CCL21	34
GO:0046209	nitric oxide metabolic process	12/647	84/18866	2.8243e-05	0.000405613	0.000267061	ITGB2/CYP1B1/KLF4/ACP5/KLF2/CAV1/PTGIS/AGT/ARG2/CLU/CD36/AIF1	12
GO:0070663	regulation of leukocyte proliferation	22/647	240/18866	2.90292e-05	0.000415731	0.000273723	SDC4/HLA-DPA1/HLA-DPB1/LEP/LGALS3/VAV3/IGF2/CORO1A/GSTP1/CCL5/GPNMB/MEF2C/VTCN1/VCAM1/CD4/ARG2/IDO1/AIF1/RAC2/AGER/CD22/ENPP3	22
GO:0010927	cellular component assembly involved in morphogenesis	14/647	112/18866	2.93018e-05	0.000417426	0.000274838	TPM1/PDGFRA/KRT8/MYH10/KRT19/ACTC1/MEF2C/PROX1/MYOZ1/CFL2/CSRP1/UGT8/NFASC/CASQ2	14
GO:0060428	lung epithelium development	8/647	37/18866	2.93118e-05	0.000417426	0.000274838	HOXA5/GRHL2/AGR2/FGF7/KLF2/SPDEF/NFIB/GATA6	8
GO:0017015	regulation of transforming growth factor beta receptor signaling pathway	15/647	127/18866	3.03295e-05	0.000430713	0.000283587	ITGA8/TGFBR3/RASL11B/TGFB1I1/CDKN1C/EMILIN1/FOLR1/FBN2/CAV1/CIDEA/FERMT1/LTBP4/CAV2/VEPH1/SPRY2	15
GO:0030308	negative regulation of cell growth	19/647	190/18866	3.05813e-05	0.000433079	0.000285145	SFRP1/SPP1/CRYAB/SFRP2/FBP1/INHBA/WT1/SCGB3A1/HRG/CDHR2/MSX1/APBB1/CDA/RGS2/HYAL1/ACVRL1/AGT/SEMA3B/NPR1	19
GO:0001659	temperature homeostasis	18/647	174/18866	3.12939e-05	0.000441805	0.00029089	NPR3/VEGFA/GATM/LEP/ACADL/CXCR4/ESRRG/EDNRB/CAV1/ADRB1/CIDEA/LAMA4/MAP2K6/EGR1/CD36/PLAC8/FABP4/PPARGC1A	18
GO:0050866	negative regulation of cell activation	20/647	207/18866	3.13713e-05	0.000441805	0.00029089	SFRP1/SDC4/HLA-F/DTX1/PDGFRA/APOE/LGALS3/INHBA/FGG/EMILIN1/CX3CL1/GPNMB/VTCN1/LDLR/FGR/ARG2/IDO1/CST7/CEACAM1/ENPP3	20
GO:0001676	long-chain fatty acid metabolic process	14/647	113/18866	3.24102e-05	0.000455176	0.000299693	ACADL/PTGDS/CYP1B1/SLC27A6/GSTP1/PTGIS/CYP2B6/CYP4A11/CYP2J2/CYP4F2/LIPE/ALOX5/ALOX15B/CYP2E1	14
GO:0050863	regulation of T cell activation	27/647	332/18866	3.25519e-05	0.000455907	0.000300175	SDC4/HLA-DPA1/DTX1/HLA-DPB1/LEP/LGALS3/GATA3/IGF2/CORO1A/THY1/TNFRSF18/CCL5/CAV1/GPNMB/VTCN1/VCAM1/CD4/ARG2/IDO1/DPP4/GSN/CEACAM1/CD2/AIF1/RAC2/AGER/CCL21	27
GO:0046879	hormone secretion	26/647	314/18866	3.34462e-05	0.000467144	0.000307574	SFRP1/SPP1/PTPRN2/LEP/GATA3/INHBA/FGG/CPE/NR0B2/IL1RN/TACR2/CCL5/EDN3/PAX8/AGT/CASR/DPP4/LTBP4/EGFR/SLC2A1/CHGA/ALOX5/TFAP2B/ADCY5/REN/INHBB	26
GO:1902905	positive regulation of supramolecular fiber organization	20/647	208/18866	3.36192e-05	0.000468274	0.000308318	SFRP1/SDC4/TPM1/APOE/MYOC/CORO1A/CX3CL1/PROX1/BIN1/SYNPO/CFL2/STMN2/CLU/PLEK/ARHGEF15/GSN/MAP1B/SCIN/MET/CCL21	20
GO:0106106	cold-induced thermogenesis	16/647	144/18866	3.56877e-05	0.000494377	0.000325504	NPR3/VEGFA/GATM/LEP/ACADL/CXCR4/ESRRG/CAV1/ADRB1/CIDEA/LAMA4/MAP2K6/CD36/PLAC8/FABP4/PPARGC1A	16
GO:0120161	regulation of cold-induced thermogenesis	16/647	144/18866	3.56877e-05	0.000494377	0.000325504	NPR3/VEGFA/GATM/LEP/ACADL/CXCR4/ESRRG/CAV1/ADRB1/CIDEA/LAMA4/MAP2K6/CD36/PLAC8/FABP4/PPARGC1A	16
GO:0014910	regulation of smooth muscle cell migration	12/647	86/18866	3.59081e-05	0.000496078	0.000326624	TPM1/ADAMTS1/GSTP1/CCL5/MEF2C/AGT/FGF9/S100A11/IGFBP3/AIF1/PLAU/PPARGC1A	12
GO:1903844	regulation of cellular response to transforming growth factor beta stimulus	15/647	129/18866	3.64994e-05	0.000502881	0.000331103	ITGA8/TGFBR3/RASL11B/TGFB1I1/CDKN1C/EMILIN1/FOLR1/FBN2/CAV1/CIDEA/FERMT1/LTBP4/CAV2/VEPH1/SPRY2	15
GO:0086009	membrane repolarization	9/647	49/18866	3.7339e-05	0.000513058	0.000337804	KCNQ1/GJA5/CAV1/ATP1A1/KCNIP2/ATP1B1/KCNE4/CASQ2/ATP1A2	9
GO:0002283	neutrophil activation involved in immune response	35/647	490/18866	3.74466e-05	0.00051315	0.000337864	PTPRN2/SERPINA1/MME/LGALS3/ITGB2/TNFAIP6/DNASE1/MGAM/CXCL1/PIGR/TIMP2/GSTP1/CDA/ITGAX/FGR/ALDOC/S100P/PYGL/SLPI/ANXA3/C3AR1/S100A11/MGST1/CD177/C3/NFASC/GSN/CD36/CEACAM1/AOC1/ALOX5/PLAC8/LAIR1/PLAU/LTF	35
GO:0019216	regulation of lipid metabolic process	32/647	431/18866	3.82971e-05	0.000523394	0.000344609	PDGFRA/LEP/APOE/TEK/VAV3/ACADL/FHL2/SORBS1/KLF4/FGF2/CAV1/SOCS2/AVPR1A/PROX1/LDLR/APOD/CIDEA/FGR/KIT/AGT/ATP1A1/CYP4A11/IGFBP7/C3/EGR1/HMGCS2/CD36/CEACAM1/FGF1/TRIB3/CCL21/PPARGC1A	32
GO:0010965	regulation of mitotic sister chromatid separation	10/647	61/18866	3.90203e-05	0.000531847	0.000350175	TACC3/UBE2C/PLK1/CDC20/AURKB/NEK6/PTTG1/DUSP1/TTK/BUB1B	10
GO:2001057	reactive nitrogen species metabolic process	12/647	87/18866	4.03752e-05	0.000548843	0.000361365	ITGB2/CYP1B1/KLF4/ACP5/KLF2/CAV1/PTGIS/AGT/ARG2/CLU/CD36/AIF1	12
GO:0019373	epoxygenase P450 pathway	6/647	20/18866	4.08249e-05	0.000553477	0.000364416	CYP1B1/CYP2B6/CYP4A11/CYP2J2/CYP4F2/CYP2E1	6
GO:0006801	superoxide metabolic process	11/647	74/18866	4.15648e-05	0.000562009	0.000370034	ITGB2/GSTP1/ACP5/SOD3/DUOX1/AGT/FBLN5/EGFR/CD177/CD36/BMP7	11
GO:0044344	cellular response to fibroblast growth factor stimulus	16/647	146/18866	4.22901e-05	0.000568837	0.000374529	SFRP1/COL1A1/GALNT3/GATA3/HHIP/DLL4/CCL5/FGF2/FGF7/HYAL1/TDGF1/NGFR/FGF9/FGF1/FGF18/SPRY2	16
GO:0072330	monocarboxylic acid biosynthetic process	22/647	246/18866	4.22935e-05	0.000568837	0.000374529	GATM/ALDH1A2/ACADL/ACSM1/PTGDS/PKLR/CSPG4/GSTP1/ACSM5/AVPR1A/PROX1/PTGIS/LPL/IDO1/CYP4A11/CEACAM1/ALOX5/ALOX15B/TRIB3/CYP2E1/AGXT/CYP27A1	22
GO:0001958	endochondral ossification	7/647	29/18866	4.36161e-05	0.000582006	0.0003832	COL1A1/TEK/CSGALNACT1/MEF2C/ALPL/FGF18/MMP13	7
GO:0036075	replacement ossification	7/647	29/18866	4.36161e-05	0.000582006	0.0003832	COL1A1/TEK/CSGALNACT1/MEF2C/ALPL/FGF18/MMP13	7
GO:0055075	potassium ion homeostasis	7/647	29/18866	4.36161e-05	0.000582006	0.0003832	KCNMA1/ATP6V1B1/ATP1A1/ATP1B1/SLC12A1/TFAP2B/ATP1A2	7
GO:0051701	interaction with host	20/647	212/18866	4.41197e-05	0.00058626	0.000386001	CCR5/CXCR4/ITGA5/NCAM1/KRT6A/CAV1/LDLR/HYAL1/GAPDH/CD4/HAVCR1/ITGB6/DPP4/EGFR/CAV2/GSN/SELPLG/CDK1/MET/CLDN1	20
GO:0045104	intermediate filament cytoskeleton organization	9/647	50/18866	4.41655e-05	0.00058626	0.000386001	KRT20/DST/NEFL/VIM/SYNM/DES/KRT18/KRT14/KRT17	9
GO:0007088	regulation of mitotic nuclear division	17/647	163/18866	4.649e-05	0.000615508	0.000405258	IGF2/TACC3/PKMYT1/UBE2C/KIF11/EDN3/PLK1/CDC20/AURKB/CAV2/NEK6/EGF/PTTG1/DUSP1/BMP7/TTK/BUB1B	17
GO:0002040	sprouting angiogenesis	19/647	196/18866	4.69729e-05	0.000620286	0.000408404	VEGFA/MEOX2/TEK/ITGA5/DLL4/KLF4/GATA2/FGF2/KLF2/RAMP2/RHOJ/ACVRL1/TDGF1/NGFR/KDR/CEACAM1/FGF1/ALOX5/APLNR	19
GO:0048562	embryonic organ morphogenesis	25/647	302/18866	4.73357e-05	0.000623458	0.000410492	ITGA8/PDGFRA/HOXA5/GATA3/GRHL2/HAND2/HOXD10/HOXB6/USH1C/HOXB8/EFEMP1/MSX1/FOLR1/GATA2/FBN2/PAX8/TCF21/MEF2C/PROX1/HYAL1/ATP6V1B1/TFAP2A/FGF9/SPRY2/BMP7	25
GO:0032530	regulation of microvillus organization	5/647	13/18866	4.78091e-05	0.000628065	0.000413526	RAP1GAP/CDHR2/USH1C/KLF5/FSCN1	5
GO:0007411	axon guidance	24/647	284/18866	4.81278e-05	0.000630624	0.00041521	LAMC2/CXCL12/VEGFA/RAP1GAP/BOC/GATA3/GFRA1/SPTBN2/MYH10/CXCR4/NCAM1/LAMA3/BMPR1B/DOK2/PALLD/NGFR/NTN4/SEMA3B/NFASC/NFIB/MATN2/PTPRO/BMP7/RAC2	24
GO:0008544	epidermis development	34/647	477/18866	5.02807e-05	0.000657139	0.000432669	COL7A1/KRT20/LAMC2/CTSK/KRT5/SULT2B1/INHBA/GRHL2/LAMB3/KRT8/KRT7/PTHLH/KRT19/AQP3/USH1C/KLF4/ST14/SFN/KRT6A/LAMA3/FGF7/COL17A1/PALLD/FST/KRT18/SOSTDC1/KRT14/NGFR/FERMT1/EGFR/ALOX15B/KRT15/KRT17/SPRR3	34
GO:1901653	cellular response to peptide	30/647	398/18866	5.04272e-05	0.000657363	0.000432816	NR4A2/LEP/IGF2/VIM/PKLR/SORBS1/ATP6V0A4/GSTP1/KLF4/KLF2/KLF5/CAV1/VCAM1/SOCS2/GPT/G6PC/ATP6V1B1/LPL/AGT/NGFR/CASR/CAV2/CD36/CEACAM1/TRIB3/MAP1B/ADCY5/PRKAR2B/AGER/INHBB	30
GO:0001892	embryonic placenta development	12/647	89/18866	5.07715e-05	0.000658415	0.000433509	GRHL2/IGF2/KRT8/KRT19/ST14/GATA2/NR2F2/ASCL2/SPINT1/EGFR/SPINT2/BMP7	12
GO:0014033	neural crest cell differentiation	12/647	89/18866	5.07715e-05	0.000658415	0.000433509	SFRP1/EDNRA/ALDH1A2/HAND2/FN1/FOLR1/EDN3/EDNRB/MEF2C/SEMA3B/ANXA6/BMP7	12
GO:0097485	neuron projection guidance	24/647	285/18866	5.08964e-05	0.000658415	0.000433509	LAMC2/CXCL12/VEGFA/RAP1GAP/BOC/GATA3/GFRA1/SPTBN2/MYH10/CXCR4/NCAM1/LAMA3/BMPR1B/DOK2/PALLD/NGFR/NTN4/SEMA3B/NFASC/NFIB/MATN2/PTPRO/BMP7/RAC2	24
GO:0070997	neuron death	28/647	360/18866	5.17164e-05	0.000666129	0.000438588	NR4A2/GABRB2/HLA-F/SERPINF1/APOE/GATA3/ITGB2/NEFL/EGLN3/CORO1A/TRIM2/CCL5/CX3CL1/GPNMB/MEF2C/GAPDH/SNCG/NGFR/CLU/TFAP2A/C1QA/GRIK5/EGR1/CHGA/TFAP2B/DHCR24/SLC1A1/PPARGC1A	28
GO:0046622	positive regulation of organ growth	10/647	63/18866	5.2e-05	0.000666129	0.000438588	TGFBR3/WT1/HAMP/FGF2/MEF2C/PROX1/ZFPM2/FGF9/GATA6/CDK1	10
GO:0045103	intermediate filament-based process	9/647	51/18866	5.20168e-05	0.000666129	0.000438588	KRT20/DST/NEFL/VIM/SYNM/DES/KRT18/KRT14/KRT17	9
GO:0071675	regulation of mononuclear cell migration	9/647	51/18866	5.20168e-05	0.000666129	0.000438588	CXCL12/LGALS3/CCL5/C3AR1/CXCL10/DUSP1/AIF1/AGER/S100A14	9
GO:0006805	xenobiotic metabolic process	14/647	118/18866	5.26962e-05	0.000671447	0.000442089	GSTM3/ACSM1/CYP1B1/GSTP1/AOC3/CES2/CYP2B6/MGST1/CYP2J2/AOC1/NAT1/CYP2E1/GLYAT/GGT1	14
GO:0033559	unsaturated fatty acid metabolic process	14/647	118/18866	5.26962e-05	0.000671447	0.000442089	PTGDS/CYP1B1/GSTP1/AVPR1A/PTGIS/ATP6V1B1/CES2/CYP2B6/CYP4A11/CYP2J2/CYP4F2/ALOX5/ALOX15B/CYP2E1	14
GO:0001990	regulation of systemic arterial blood pressure by hormone	8/647	40/18866	5.33239e-05	0.000677747	0.000446237	MME/HSD11B2/GJA5/EDN3/AVPR1A/AGT/ENPEP/REN	8
GO:0070374	positive regulation of ERK1 and ERK2 cascade	20/647	215/18866	5.38198e-05	0.000682343	0.000449263	PDGFRA/APOE/TEK/HAND2/FGG/CCL5/FGF2/CX3CL1/GPNMB/CD4/CASR/CCL20/AKAP12/KDR/EGFR/CD36/FGF18/SPRY2/AGER/CCL21	20
GO:0014074	response to purine-containing compound	16/647	149/18866	5.42151e-05	0.000685646	0.000451438	ABCC9/AQP1/COL1A1/KCNQ1/TEK/WT1/PKLR/PER1/DUOX1/SPARC/DUSP1/CASQ2/REN/GPD1/AGXT/PPARGC1A	16
GO:0030728	ovulation	6/647	21/18866	5.55039e-05	0.000700203	0.000461022	LEP/ADAMTS1/TNFAIP6/INHBA/RGS2/INHBB	6
GO:0051235	maintenance of location	26/647	324/18866	5.67021e-05	0.000713549	0.000469809	CCR5/LEP/APOE/CORO1A/THY1/NOL3/FGF2/FBN2/ALB/CX3CL1/CAV1/CIDEA/CD4/LPL/GRIK5/C3/JPH2/GSN/CD36/CXCL10/ANXA6/CASQ2/SCIN/ATP1A2/APLNR/CCL21	26
GO:0051651	maintenance of location in cell	20/647	216/18866	5.74512e-05	0.00072119	0.00047484	CCR5/APOE/CORO1A/THY1/NOL3/FGF2/ALB/CX3CL1/CAV1/CD4/GRIK5/JPH2/GSN/CXCL10/ANXA6/CASQ2/SCIN/ATP1A2/APLNR/CCL21	20
GO:0051306	mitotic sister chromatid separation	10/647	64/18866	5.9762e-05	0.00074835	0.000492723	TACC3/UBE2C/PLK1/CDC20/AURKB/NEK6/PTTG1/DUSP1/TTK/BUB1B	10
GO:0030500	regulation of bone mineralization	11/647	77/18866	6.05463e-05	0.000754455	0.000496742	DDR2/BMPR1B/COMP/ECM1/FBN2/MEF2C/TFAP2A/S1PR1/ALOX5/BMP7/LTF	11
GO:0061333	renal tubule morphogenesis	11/647	77/18866	6.05463e-05	0.000754455	0.000496742	VEGFA/GATA3/WT1/COL4A1/WNK4/FGF2/PAX8/TCF21/MEF2C/AGT/FGF1	11
GO:0007409	axonogenesis	34/647	482/18866	6.17927e-05	0.000765123	0.000503766	S100B/SPP1/NR4A2/LAMC2/CXCL12/VEGFA/RAP1GAP/BOC/APOE/GATA3/GFRA1/NEFL/SPTBN2/MYH10/CXCR4/THY1/NCAM1/FN1/APBB1/LAMA3/BMPR1B/DOK2/UCHL1/PALLD/NGFR/NTN4/SEMA3B/NFASC/NFIB/MATN2/PTPRO/MAP1B/BMP7/RAC2	34
GO:0001701	in utero embryonic development	29/647	383/18866	6.18505e-05	0.000765123	0.000503766	EDNRA/TPM1/VEGFA/PDGFRA/GATA3/GRHL2/HAND2/IGF2/KRT8/MYH10/ELF3/KRT19/ST14/MSX1/GATA2/KLF2/NR2F2/SLC25A34/TM4SF1/ACVRL1/ETNK2/ZFPM2/ASCL2/SPINT1/EGFR/GATA6/SPINT2/HSD17B2/BMP7	29
GO:1901888	regulation of cell junction assembly	19/647	200/18866	6.1854e-05	0.000765123	0.000503766	SFRP1/SDC4/VEGFA/TEK/MYOC/FAM107A/HRG/THY1/THBS2/CLDN5/CAV1/MEF2C/APOD/ACVRL1/AGT/KDR/PDLIM5/CLDN3/CLDN1	19
GO:0042129	regulation of T cell proliferation	17/647	167/18866	6.31848e-05	0.000779688	0.000513356	SDC4/HLA-DPA1/HLA-DPB1/LEP/LGALS3/IGF2/CORO1A/CCL5/GPNMB/VTCN1/VCAM1/CD4/ARG2/IDO1/AIF1/RAC2/AGER	17
GO:0060021	roof of mouth development	12/647	91/18866	6.34061e-05	0.000780524	0.000513907	TGFBR3/PDGFRA/MEOX2/INHBA/HAND2/MSX1/MSC/CLDN5/TCF21/MEF2C/TFAP2A/BNC2	12
GO:0071772	response to BMP	17/647	168/18866	6.81065e-05	0.000834346	0.000549344	SFRP1/CDH5/TGFBR3/SFRP2/GATA3/MSX1/BMPR1B/COMP/FST/SOSTDC1/ACVRL1/SPINT1/EGR1/GATA6/TFAP2B/SPINT2/BMP7	17
GO:0071773	cellular response to BMP stimulus	17/647	168/18866	6.81065e-05	0.000834346	0.000549344	SFRP1/CDH5/TGFBR3/SFRP2/GATA3/MSX1/BMPR1B/COMP/FST/SOSTDC1/ACVRL1/SPINT1/EGR1/GATA6/TFAP2B/SPINT2/BMP7	17
GO:0014812	muscle cell migration	13/647	106/18866	6.85049e-05	0.000837208	0.000551228	PLAT/TPM1/ADAMTS1/GSTP1/CCL5/MEF2C/AGT/FGF9/S100A11/IGFBP3/AIF1/PLAU/PPARGC1A	13
GO:0050670	regulation of lymphocyte proliferation	20/647	219/18866	6.96885e-05	0.000849631	0.000559408	SDC4/HLA-DPA1/HLA-DPB1/LEP/LGALS3/VAV3/IGF2/CORO1A/CCL5/GPNMB/MEF2C/VTCN1/VCAM1/CD4/ARG2/IDO1/AIF1/RAC2/AGER/CD22	20
GO:0050727	regulation of inflammatory response	31/647	425/18866	7.01459e-05	0.000853163	0.000561733	CDH5/SERPINF1/LEP/APOE/GATA3/TNFAIP6/DNASE1/TEK/GSTP1/CCL5/KLF4/ACP5/PER1/EDNRB/CX3CL1/LDLR/APOD/PTGIS/LPL/AGT/IDO1/CREB3L3/CST7/EGFR/C3/ALOX5/FABP4/CALCRL/AGER/ENPP3/GGT1	31
GO:0034599	cellular response to oxidative stress	25/647	310/18866	7.23479e-05	0.000877845	0.000577984	NR4A2/TPM1/AQP1/PDGFRA/CYP1B1/GSTP1/ANKRD2/KLF4/NOL3/SOD3/KLF2/FBLN5/MGST1/EGFR/CD36/ALOX5/RHOB/PYCR1/AIF1/BMP7/MGAT3/SLC1A1/CDK1/MET/PPARGC1A	25
GO:0042552	myelination	15/647	137/18866	7.3625e-05	0.000891214	0.000586786	S100B/MYOC/PRX/MAL2/JAM3/CXCR4/ITGAX/CLU/BCAS1/GAL3ST1/JAM2/CST7/UGT8/NFASC/ID4	15
GO:0032928	regulation of superoxide anion generation	6/647	22/18866	7.41147e-05	0.00089501	0.000589286	ITGB2/GSTP1/ACP5/AGT/EGFR/CD177	6
GO:0055017	cardiac muscle tissue growth	13/647	107/18866	7.55781e-05	0.000909158	0.000598601	TGFBR3/SORBS2/HAMP/FGF2/MEF2C/RGS2/AGT/ZFPM2/FGF9/S1PR1/GATA6/PDLIM5/CDK1	13
GO:0043312	neutrophil degranulation	34/647	487/18866	7.56439e-05	0.000909158	0.000598601	PTPRN2/SERPINA1/MME/LGALS3/ITGB2/TNFAIP6/MGAM/CXCL1/PIGR/TIMP2/GSTP1/CDA/ITGAX/FGR/ALDOC/S100P/PYGL/SLPI/ANXA3/C3AR1/S100A11/MGST1/CD177/C3/NFASC/GSN/CD36/CEACAM1/AOC1/ALOX5/PLAC8/LAIR1/PLAU/LTF	34
GO:1905818	regulation of chromosome separation	10/647	66/18866	7.82736e-05	0.000938545	0.000617949	TACC3/UBE2C/PLK1/CDC20/AURKB/NEK6/PTTG1/DUSP1/TTK/BUB1B	10
GO:0072080	nephron tubule development	12/647	93/18866	7.86662e-05	0.000938823	0.000618133	VEGFA/GATA3/WT1/WNK4/FGF2/PAX8/TCF21/MEF2C/AGT/FGF1/TFAP2B/CALB1	12
GO:2000117	negative regulation of cysteine-type endopeptidase activity	12/647	93/18866	7.86662e-05	0.000938823	0.000618133	CRYAB/VEGFA/AQP1/SFRP2/KLF4/NOL3/SFN/NGFR/CST7/TFAP2B/DHCR24/LTF	12
GO:0002064	epithelial cell development	20/647	221/18866	7.90825e-05	0.000939382	0.0006185	CDH5/GSTM3/VEGFA/HOXA5/GRHL2/VIM/CXCR4/ST14/SFN/PALLD/KLF5/CLDN5/PROX1/ACTA2/SPDEF/RAB25/SPINT2/CLDN3/MET/CLDN1	20
GO:0032944	regulation of mononuclear cell proliferation	20/647	221/18866	7.90825e-05	0.000939382	0.0006185	SDC4/HLA-DPA1/HLA-DPB1/LEP/LGALS3/VAV3/IGF2/CORO1A/CCL5/GPNMB/MEF2C/VTCN1/VCAM1/CD4/ARG2/IDO1/AIF1/RAC2/AGER/CD22	20
GO:0060348	bone development	19/647	204/18866	8.07759e-05	0.000954018	0.000628138	COL1A1/SFRP2/LEP/TEK/MYOC/MSX1/ACP5/BMPR1B/COMP/CSGALNACT1/MEF2C/KIT/ALPL/SPARC/TFAP2A/ANXA6/FGF18/MMP13/LTF	19
GO:0043409	negative regulation of MAPK cascade	18/647	187/18866	8.08776e-05	0.000954018	0.000628138	SFRP1/SFRP2/MECOM/APOE/FBLN1/GSTP1/KLF4/DUSP5/CBLC/EMILIN1/PER1/UCHL1/CAV1/RGS2/AGT/SPRY2/DUSP1/BMP7	18
GO:0048639	positive regulation of developmental growth	18/647	187/18866	8.08776e-05	0.000954018	0.000628138	CXCL12/VEGFA/TGFBR3/LEP/IGF2/WT1/AGR2/HAMP/CXCR4/FN1/FGF2/MEF2C/PROX1/ZFPM2/FGF9/GATA6/MAP1B/CDK1	18
GO:0071466	cellular response to xenobiotic stimulus	14/647	123/18866	8.33004e-05	0.000980323	0.000645457	GSTM3/ACSM1/CYP1B1/GSTP1/AOC3/CES2/CYP2B6/MGST1/CYP2J2/AOC1/NAT1/CYP2E1/GLYAT/GGT1	14
GO:1903532	positive regulation of secretion by cell	25/647	313/18866	8.44275e-05	0.000991292	0.000652679	SPP1/SDC4/CXCL12/HLA-F/LEP/ITGB2/INHBA/FGG/NR0B2/MYH10/TACR2/APBB1/GATA2/EDN3/AVPR1A/FGR/GAPDH/AGT/CACNA1H/CASR/EGFR/CD177/MAP2K6/MYOM1/INHBB	25
GO:0030856	regulation of epithelial cell differentiation	17/647	171/18866	8.49584e-05	0.000995227	0.00065527	CDH5/CTSK/VEGFA/SULT2B1/GATA3/GRHL2/AQP3/SFN/FGF2/PAX8/CLDN5/CAV1/ACVRL1/XDH/CEACAM1/ALOX15B/SPRY2	17
